# Supplementary material for: Modulation of the transcription regulatory program in yeast cells committed to sporulation
Source: PubMed Central journal article supplement (PMC1557749; doi:10.1186/gb-2006-7-3-r20), 2006-03-08
Supplement: gb-2006-7-3-r20-S3.pdf [file gb-2006-7-3-r20-S3.pdf]

Supplementary Table S1: Early sporulation Genes

The early sporulation genes are listed. The average pattern ( $\log_2$ ratio) is plotted upon transfer to YPD (which was followed for 5, 20 and 40 minutes after the transfer). The genes in each group, along with a one line description, are indicated.

Template genes used to create this group are: *ZIP1*, *HOP1*, *HOP2* and *SPO16*.

| Average expression:                                                                                                                                                                                                                                                                                                                                                                                                                                                                                                                                                                                                                                                                                                                                                                                                                                                                                                                                                                                                                                                                                                                                                                                                                                                                                                                                                                                                                                                                                                                                                                                                                                                                                                                                                                                                                                                                                                                                                                                                                                                                                                                                                                                                                                                                                                                                                                                                                                                                                                                                                                                                                                                                                                                                                                                                                                                                                                                                                                                                                                                                                                                                                                                                                                                                                                                                                                                                                                                      | 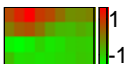 |
|--------------------------------------------------------------------------------------------------------------------------------------------------------------------------------------------------------------------------------------------------------------------------------------------------------------------------------------------------------------------------------------------------------------------------------------------------------------------------------------------------------------------------------------------------------------------------------------------------------------------------------------------------------------------------------------------------------------------------------------------------------------------------------------------------------------------------------------------------------------------------------------------------------------------------------------------------------------------------------------------------------------------------------------------------------------------------------------------------------------------------------------------------------------------------------------------------------------------------------------------------------------------------------------------------------------------------------------------------------------------------------------------------------------------------------------------------------------------------------------------------------------------------------------------------------------------------------------------------------------------------------------------------------------------------------------------------------------------------------------------------------------------------------------------------------------------------------------------------------------------------------------------------------------------------------------------------------------------------------------------------------------------------------------------------------------------------------------------------------------------------------------------------------------------------------------------------------------------------------------------------------------------------------------------------------------------------------------------------------------------------------------------------------------------------------------------------------------------------------------------------------------------------------------------------------------------------------------------------------------------------------------------------------------------------------------------------------------------------------------------------------------------------------------------------------------------------------------------------------------------------------------------------------------------------------------------------------------------------------------------------------------------------------------------------------------------------------------------------------------------------------------------------------------------------------------------------------------------------------------------------------------------------------------------------------------------------------------------------------------------------------------------------------------------------------------------------------------------------|-----------------------------------------------------------------------------------|
| <p>SNC1; YAL030W Synaptobrevin (v-SNARE) homolog present on post-Golgi vesicles<br/>           ACS1; FUN44; YAL054C Acetyl-CoA synthetase<br/>           RFA1; BUF2; (RPA1); FUN3; SRR1; YAR007C DNA replication factor A, 69K subunit, binds single-stranded DNA<br/>           NTH2; YBR0106; YBR001C Putative secondary neutral trehalase (alpha, alpha-trehalase), may catalyze conversion of trehalose to glucose<br/>           MUM2; YBR0514; YBR057C; SPOT8 Protein required for premeiotic DNA synthesis and sporulation<br/>           YBR090C; YBR0811b Protein of unknown function<br/>           YBR113W; YBR0908e Protein of unknown function<br/>           NPL4; YBR1231; YBR170C Nuclear pore protein<br/>           UMP1; YBR1234; YBR173C Proteasome maturation factor chaperone involved in proteasome assembly<br/>           YBR184W; YBR1306 Protein of unknown function<br/>           PCH2; YBR1308; YBR186W Protein required for cell cycle arrest at the pachytene stage of meiosis in a zip1 mutant, has similarity to Rpt5p and NSF vesicular fusion protein and other members of the AAA family of ATPases<br/>           POP4; YBR1725; YBR257W Protein component of both the RNase MRP and RNase P ribonucleoproteins, which are involved in rRNA and tRNA processing respectively<br/>           YBR280C; YBR2017 Protein with similarity to Srm1p/Prp20p<br/>           PRD1; YCL434; YCL057W Proteinase yscD (saccharolysin), contains the zinc metalloendoprotease motif HEXXH<br/>           YCR062W; YCR061W; YCR904 Protein of unknown function has predicted transmembrane segments and similarity to Ytp1p<br/>           YCR082W Protein with similarity to Rbk1p<br/>           YCR105W NADPH-dependent cinnamyl-alcohol dehydrogenase, has similarity to bovine alcohol dehydrogenase<br/>           CDC7; SAS1; (OAF2); D2855; YDL017W Protein kinase that acts in complex with Dbf4p to affect initiation of DNA synthesis, commitment to sporulation, DNA repair, and meiotic recombination<br/>           YDL046W; D2699 Protein of unknown function<br/>           RPN5; (RPN4); D1572; YDL147W Non-ATPase subunit of the 26S proteasome complex<br/>           MSH5; D1542; YDL154W Meiosis-specific protein involved in reciprocal recombination not involved in mismatch repair<br/>           YDL187C; D1276 Protein of unknown function questionable ORF<br/>           YDL199C; D1209 Member of the hexose transporter family of the major facilitator superfamily (MFS)<br/>           COS7; D0215; YDL248W Member of the COS family of subtelomerically-encoded proteins<br/>           YDR015C; PZF129; D3234 Protein of unknown function<br/>           YDR018C; D3246; YD9335.04 Putative acyltransferase with similarity to Ybr042p<br/>           DBF4; DNA52; MTS2; D4205; YD9609.07; YDR052C Regulatory subunit for Cdc7p protein kinase, required for G1/S transition<br/>           SDH4; YD9395.11; YDR178W Membrane anchor subunit in the succinate dehydrogenase complex<br/>           SPC19; YD9346.11; YDR201W Protein of the spindle pole body<br/>           CHL4; CTF17; MCM17; YD9320A.04; YDR254W Chromosome segregation protein required for stable maintenance and transmission of normal and artificial chromosomes<br/>           YDR275W; D9954.3 Protein of unknown function<br/>           ZIP1; D9819.9; YDR285W Structural protein of the synaptonemal complex central element</p> |                                                                                   |

has predicted coiled-coil domain  
HNT2; APH1; D9740.15; YDR305C Diadenosine polyphosphate hydrolase member of histidine triad (HIT) protein superfamily  
NUF1; SPC110; D9476.3; YDR356W Spindle pole body component with coiled-coil structure, determines the spacing between the ends of microtubules and the central plaque  
YDR374C; D9481.16 Protein of unknown function  
ECM11; D9461.31; YDR446W Protein possibly involved in cell wall structure or biosynthesis  
YDR506C; D9719.12 Protein with similarity to Fet5p  
CIN8; KSL2; SLN2; SDS15; CST16; YEL061C Kinesin-related protein involved in establishment and maintenance of mitotic spindle  
YER010C Protein of unknown function  
PRO3; (ORE2); YER023W Delta-1-pyrroline-5-carboxylate reductase (P5C reductase), catalyzes the third and last step in proline biosynthesis pathway  
YER084W Protein of unknown function  
BOI2; BEB1; YER114C Protein involved in bud formation that binds to Bem1p, has an SH3 domain  
DMC1; (MED1); ISC2; YER179W Meiosis-specific recombination protein structurally related to *S. cerevisiae* Rad51p, Rad55p, Rad57p, and to *E. coli* RecA  
MSH4; YFL003C Meiosis-specific protein homologous to *E. coli* MutS  
YFL006W Protein of unknown function  
TUB2; SHE8; ARM10; YFL037W Tubulin beta chain, required for mitosis and karyogamy  
YFL044C Protein of unknown function, has a single C2H2-type zinc finger  
RPN12; NIN1; (RPN11); YFR052W Non-ATPase component of 26S proteasome complex required for activation of Cdc28p protein kinase  
HOP2; G3642; YGL033W Protein required for pairing of homologous chromosomes in meiosis  
MTC2; G3632; YGL036W Protein of unknown function  
MPS2; MMC1; G3219; YGL075C Protein of the nuclear envelope/endoplasmic reticulum required for spindle pole body assembly and normal chromosome segregation  
RAD54; G1821; YGL163C DNA-dependent ATPase of the Snf2p family, required for mitotic recombination and DNA repair of X-ray damage  
YGL183C; G1604 Protein of unknown function  
IME4; SPO8; G1337; YGL192W Positive transcription factor for IME1 and IME2, mediates control of meiosis by carrying signals regarding mating type ( $a/\alpha$ ) and nutritional status  
SHE10; G0954; YGL228W Protein that causes lethality when overexpressed  
DOC1; APC10; HRC283; G0910; YGL240W Component of the anaphase-promoting complex (APC), required for Clb2p degradation and for the metaphase-anaphase transition  
ZIP2; MRD1; NRC704; G0568; YGL249W Protein involved in meiotic recombination, chromosome synapsis, and synaptonemal complex formation  
HFM1; MER3; GOP NRE1041; G0562; YGL251C DNA/RNA helicase involved in meiotic recombination, member of the DExH-box type helicase family with Ski2p and Brr2p  
PRE9; (PRS5); Y13; G6405; YGR135W Proteasome subunit alpha3\_sc  
YGR168C; G7059 Protein with similarity to human vasoactive intestinal peptide receptor  
PIR:JN0604  
RIM4; NOS1; YHL024W Protein required for sporulation and formation of meiotic spindle, has two RNA recognition motif (RRM) domains  
COS8; YHL048W Member of the COS family of subtelomerically-encoded proteins  
YNG2; NBN1; YHR090C Component of NuA4 histone acetyltransferase complex with effect on BEM and RAD phenotypes  
ERP5; YHR110W Protein with similarity to COPII-coated vesicle proteins Emp24p and Erv25p  
SPO12; YHR152W Sporulation protein required for chromosome division in meiosis I  
SPO16; YHR153C Early meiotic protein required for efficient spore formation  
REC104; YHR157W Meiosis-specific protein, mutants are defective in synaptonemal complex formation and have reduced recombination  
YHR202W Protein of unknown function  
YIL024C; Y13299.07 Protein of unknown function  
IRR1; (SCC3); Y13299.05; YIL026C Component of cohesin complex required for sister chromatid cohesion during DNA replication  
ULP2; SMT4; Y19905.17; YIL031W Smt3p-specific protease, degrades conjugated ubiquitin-

like protein Smt3p  
HOP1; YIL072W Meiosis-specific protein associated with lateral elements of the synaptonemal complex, involved in homologous chromosomesynapsis and chiasmata formation  
SPO22; YIL073C Protein required for meiosis and sporulation, has cecropin family signature  
YIL152W Protein of unknown function  
HXT12; YI9402.06B; YI9402.06AW; YIL170W; YIL171W Member of the hexose transporter family of the major facilitator superfamily (MFS)  
PRE3; CRL21; J1407; YJL001W Proteasome subunit beta1\_sc involved in peptidyl-glutamyl peptide hydrolytic activity of the proteasome  
SNX4; J1244; YJL036W Putative nexin sorting protein possibly involved in proteasome function  
YJL045W; J1194 Protein with strong similarity to succinate dehydrogenase flavoprotein, has an FAD-binding domain  
SIP4; J0922; YJL089W Transcriptional activator of gluconeogenic genes through CSRE elements, activated by Snf1p kinase, contains aZn[2]-Cys[6] fungal-type binuclear cluster domain  
GLG2; J0663; YJL137C Self-glucosylating initiator of glycogen synthesis  
YJL149W; J0634 Protein of unknown function, contains a cyclin F-box  
YJL178C; J0490 Protein of unknown function  
HXT9; HRC567; J0222; YJL219W Member of the hexose transporter family of the major facilitator superfamily (MFS)  
IME1; J1916; YJR094C Transcription factor required for sporulation, positive regulator of IME2 and many sporulation genes  
YJR098C; J1936 Protein of unknown function  
COS5; J2410; YJR161C Member of the COS family of subtelomerically-encoded proteins  
PUT3; YKL015W Transcription factor that activates the proline utilization pathway genes, contains a Zn[2]-Cys[6] fungal-type binuclear clusterdomain in the N-terminal region  
MDH1; ACN50; YKL085W Malate dehydrogenase, mitochondrial  
YKL121W; YKL525 Protein of unknown function, member of WD (WD-40) repeat family  
SDH3; CYB3; YKL4; YKL141W Membrane anchor subunit for Sdh1p in the succinate dehydrogenase complex  
YKR005C; YK104 Protein of unknown function  
TOF2; YK109; YKR010C Protein that interacts with DNA topoisomerase I  
YKR083C; YKR403 Protein with similarity to paramyosin  
YLL030C; L0932 Protein with similarity to Ca<sup>2+</sup>-transporting ATPase  
GPI13; MPC1; L0929; YLL031C Protein involved in glycosylphosphatidylinositol biosynthesis, probably responsible for addingphosphoethanolamine to the third mannose  
RNP1; L0713; YLL046C Ribonucleoprotein 1, contains two RNA recognition (RRM) domains which include RNP-1 octamer and RNP-2 hexamer motifs  
YLL047W; L0709 Protein of unknown function  
PCD1; L9634.8; YLR151C; L3325 Peroxisomal nudix hydrolase, has diphosphatase activity specific for coenzyme A and CoA derivatives  
YLR346C; L8300.14 Protein of unknown function  
CTR3; L9931.6; YLR411W High-affinity copper transporter  
YLR446W; L9324.5 Protein with similarity to human hexokinase I  
HMG2; L9324.2; YLR450W 3-Hydroxy-3-methylglutaryl-coenzyme A reductase 2, rate limiting enzyme for sterol biosynthesis, converts HMG-CoAto mevalonate  
RAD52; YML032C Protein required for recombination and repair of X-ray damage, has a late function in meiotic recombination  
CAT2; YCAT CAT YM8054.01; YML042W Carnitine O-acetyltransferase, peroxisomal and mitochondrial  
MFT1; MFT52; YML062C Targeting factor for mitochondrial precursor proteins, member of a family of transmembrane transition metal transporters  
TUB1; YML085C Tubulin alpha-1 chain, required for mitosis and karyogamy  
YML122C; YM7056.04 Protein of unknown function, questionable ORF  
COS3; YM4987.03; YML132W Member of the COS family of subtelomerically-encoded proteins  
AAC1; (ANC1); YM9796.09; YMR056C ADP/ATP carrier protein of the mitochondrial carrier family (MCF) of membrane transporters

PDS5; SPO27; YM9582.01; YM9916.15; YMR076C Protein required for sister chromatid cohesion and chromosome condensation functions

MUB1; YM6543.07; YMR100W Zinc finger protein, involved in the regulation of bud site selection

YMR101C; SRT1; YM6543.08 Protein that acts as suppressor of *rer2* mutation, has similarity to Rer2p

YMR107W; YM9718.06 Protein of unknown function, induced during aerobic growth

SAS2; ESO1; YM9553.03; YMR127C Protein involved in silencing at HMR, has a single C2H2-type zinc finger

REC114; YM9375.02; YMR133W Meiotic recombination protein, mutants are defective in double-strand break formation

YMR134W; YM9375.03 Protein involved in iron metabolism

YMR148W; YM9375.18 Protein of unknown function

SGS1; (TPS1); YM9646.02; YMR190C DNA helicase of DEAD/DEAH family, has similarity to the human Werner's and Bloom's syndromes genes and to *E. coli* RecQ 3'-5' DNA helicase

YMR299C

FKS3; YM9952.08; YMR306W Protein with similarity to Fks1p and Gsc2p

SPO1; N2858; YNL012W Transcriptional regulator involved in sporulation has strong similarity to phospholipase B enzymes

YNL116W; N1925 Protein of unknown function

YNL150W; N1773 Protein of unknown function

SLZ1; N1386; YNL196C Sporulation-specific protein

COS1; N0275; YNL336W Member of the COS family of subtelomerically-encoded proteins

HTZ1; HTA3; O2345; YOL012C Histone-related protein that can suppress histone H4 point mutation

PKH2; HRC1081; O0784; YOL100W Serine/threonine protein kinase with similarity to mammalian 3-phosphoinositide-dependent protein kinase

YOL131W; AOA108; O0517 Protein of unknown function

ASE1; O2806; YOR29-09; YOR058C Microtubule-associated protein localized to the spindle midzone, required for anaphase spindle elongation

YOR073W; YOR29-24; O2945 Protein of unknown function

RTS2; O2956; YOR29-28; YOR077W Protein with similarity to mouse KIN17 protein, has a single C2H2-type zinc finger

LSC1; YOR3352; O3352; YOR142W Alpha subunit of succinyl-CoA synthetase (succinyl-CoA ligase, succinate thiokinase)

SMP3; LAS2; SAP2; O3527; YOR149C Protein required for plasmid maintenance functions in the protein kinase C pathway

GAC1; O4625; YOR178C Regulatory subunit for protein serine/threonine phosphatase Glc7p

RPT4; SUG2; CRL13; PCS1; O5345; YOR259C Component of 26S proteasome complex and member of the AAA family of ATPases

RPN8; (RPN7); NAS3; O5360; YOR261C Non-ATPase subunit of the 26S proteasome complex

SNF2; SWI2; GAM1; TYE3; HAF1; (RIC1); MNU1; O5509C; YOR290C Component of SWI-SNF global transcription activator complex, acts to assist gene-specific activators through chromatin remodeling

FAA1; O6136; YOR317W Long-chain fatty acid CoA ligase (fatty acid activator 1) can incorporate exogenous myristate into myristoyl-CoA and other fatty acids to the CoA derivatives

CIN1; O6350; YOR349W Protein involved in chromosome segregation, required for microtubule stability

MNE1; O6353; YOR350C Protein of unknown function

MEK1; MRE4; O6357; YOR351C Serine/threonine protein kinase required for meiotic recombination

RAD17; O6670; YOR368W Checkpoint protein required for DNA damage-induced arrest in G2 at the RAD9 checkpoint

NDD1; O6682; YOR372C Protein required for nuclear division positively but indirectly affects transcription of a subset of genes required for the cell cycle

YPL034W; P7102.15 Protein of unknown function

CAR1; (AGA2); LPH15; ARG *cargA* *casn1*; *otA* YPL111W Arginase, catalyzes the first step in arginine degradation and acts as an allosteric regulator of ornithine carbamyltransferase

MEI5; LPH6; YPL121C Meiotic protein required for synapsis and meiotic recombination  
MLH3; YPL164C; P2550 Insertion and deletion mismatch repair protein  
CIT3; LPZ1W; YP9723.01; YPR001W Citrate synthase, mitochondrial, converts acetyl-CoA  
and oxaloacetate into citrate plus CoA  
PDH1; YP9723.02; LPZ2W; YPR002W Protein possibly involved in propionate utilization  
SPO69; YP9723.07; LPZ7C; REC8; YPR007C Protein required for meiosis and sporulation  
ATP20; SU\_G YP9531.14; YPR020W F1F0-ATP synthase complex F0 membrane domain g  
subunit  
YPR061C; YP9499.16 Protein with similarity to E. coli DnaJ and other DnaJ-like proteins  
KIM3; P9325.4; YPR164W Protein involved in resistance to mutagens such as diepoxybutane  
and mitomycin C  
YMR052C-A Protein of unknown function  
MEI4; YER044C-A Protein required early in meiosis for meiotic recombination, chromosome  
synapsis, and viable spore formation  
YMR306C-A Protein of unknown function  
YMR119W-A Protein of unknown function

## Supplementary Table S2

complete list of genes used in figure 3d

cluster 1 (early sporulation)

|         |                                                                                                                                                                                                           |
|---------|-----------------------------------------------------------------------------------------------------------------------------------------------------------------------------------------------------------|
| RAD51   | RAD51; MUT5; YER095W Protein that stimulates pairing and strand-exchange between homologous single-stranded and double-stranded DNA,functionally similar to E. coli RecA protein                          |
| RFA2    | RFA2; BUF1; N0368; YNL312W DNA replication factor A, 36K subunit phosphorylated at the G1/S transition and dephosphorylated at mitosis                                                                    |
| PIF1    | PIF1; TST1; YM9958.01; YML061C Single-stranded DNA-dependent ATPase and 5'-3' DNA helicase required for maintenance and repair ofmitochondrial DNA, also functions in nucleus to regulate telomere length |
| CAC2    | CAC2; YML102W Chromatin assembly complex subunit 1, involved in nucleosome assembly linked with DNA replication, has WD (WD-40)repeats                                                                    |
| RFA1    | RFA1; BUF2; (RPA1); FUN3; SRR1; YAR007C DNA replication factor A, 69K subunit, binds single-stranded DNA                                                                                                  |
| UBC13   | UBC13; YD6652.04; YDR092W Ubiquitin-conjugating (E2) enzyme involved in Rad6-dependent post-replicative repair pathway                                                                                    |
| RFA3    | RFA3; J0506; YJL173C DNA replication factor A, 13K subunit                                                                                                                                                |
| RAD54   | RAD54; G1821; YGL163C DNA-dependent ATPase of the Snf2p family, required for mitotic recombination and DNA repair of X-ray damage                                                                         |
| REC104  | REC104; YHR157W Meiosis-specific protein, mutants are defective in synaptonemal complex formation and have reduced recombination                                                                          |
| RAD17   | RAD17; O6670; YOR368W Checkpoint protein required for DNA damage-induced arrest in G2 at the RAD9 checkpoint                                                                                              |
| RAD53   | RAD53; MEC2; SPK1; (SAD1); P2588; YPL153C Serine/threonine/tyrosine protein kinase with a checkpoint function in S and G2                                                                                 |
| KIM3    | KIM3; P9325.4; YPR164W Protein involved in resistance to mutagens such as diepoxybutane and mitomycin C                                                                                                   |
| YDR386W | MUS81; SLX3; D9509.6; YDR386W Protein involved in repair of DNA damage, part of a complex with Rad54p and Mms4p                                                                                           |
| YER104W | RTT105; YER104W Protein that inhibits transposable element Ty1 transposition                                                                                                                              |
| REC107  | REC107; MER2; J1462; YJR021C Meiotic recombination protein, component of a complex that processes double-stranded DNA breaks                                                                              |
| KIM2    | REM50; KIM2; L1377; YLL002W Protein involved in resistance to mutagens such as diepoxybutane and mitomycin C                                                                                              |
| MSH4    | MSH4; YFL003C Meiosis-specific protein homologous to E. coli MutS                                                                                                                                         |
| YGL183C | YGL183C; G1604 Protein of unknown function                                                                                                                                                                |
| YIR025W | YIR025W Protein of unknown function                                                                                                                                                                       |
| RAD52   | RAD52; YML032C Protein required for recombination and repair of X-ray damage, has a late function in meiotic recombination                                                                                |
| REC114  | REC114; YM9375.02; YMR133W Meiotic recombination protein, mutants are defective in double-strand break formation                                                                                          |

|         |                                                                                                                                                                   |
|---------|-------------------------------------------------------------------------------------------------------------------------------------------------------------------|
| YPL164C | MLH3; YPL164C; P2550 Insertion and deletion mismatch repair protein                                                                                               |
| DMC1    | DMC1; (MED1); ISC2; YER179W Meiosis-specific recombination protein structurally related to <i>S. cerevisiae</i> Rad51p, Rad55p, Rad57p, and to <i>E.coli</i> RecA |
| YHL024W | RIM4; NOS1; YHL024W Protein required for sporulation and formation of meiotic spindle, has two RNA recognition motif (RRM) domains                                |
| HHO1    | HHO1; LPI17; YPL127C Histone H1                                                                                                                                   |

cluster 2 (middle sporulation)

|       |                                                                                                                                                                                                  |
|-------|--------------------------------------------------------------------------------------------------------------------------------------------------------------------------------------------------|
| RAD57 | RAD57; YD8119.10; D2970; YDR004W Component of recombinosome complex involved in meiotic recombination and recombinational repair, with Rad55p promotes DNA strand exchange by Rad51p recombinase |
| TFB1  | TFB1; D9740.3; YDR311W Component of RNA polymerase II transcription initiation factor TFIIH (factor b), 75 kDa subunit                                                                           |
| IMP2' | YIL154C; (IMP2); BLM25; HCY39 Protein involved in control of mitochondrial sugar utilization and repair of oxidative DNA lesions                                                                 |
| MSH5  | MSH5; D1542; YDL154W Meiosis-specific protein involved in reciprocal recombination not involved in mismatch repair                                                                               |
| MFT1  | MFT1; MFT52; YML062C Targeting factor for mitochondrial precursor proteins, member of a family of transmembrane transition metal transporters                                                    |
| SAE2  | SAE2; COM1; G1639; YGL175C Protein involved in meiotic recombination                                                                                                                             |
| SPO11 | SPO11; YHL022C Catalytic subunit of the meiotic double strand break transesterase                                                                                                                |
| TFB2  | TFB2; LPH5; YPL122C Component of RNA polymerase II transcription initiation TFIIH (factor b), 55 kDa subunit                                                                                     |
| DIN7  | DIN7; DIN3; YD9320B.02; YDR263C Mitochondrial inner membrane nuclease with a role in stabilizing the mitochondrial genome expression is induced by DNA damage                                    |
| REV7  | REV7; YIL139C DNA polymerase zeta, small subunit, required for mutagenesis by physical and chemical agents                                                                                       |
| DHS1  | EXO1; DHS1; O2727; OR26.23; YOR033C Double-stranded DNA 5'→3' exonuclease, involved in mismatch repair and recombination                                                                         |
| REV3  | REV3; PSO1; P2535; YPL167C DNA polymerase zeta, involved in mutagenic translesion DNA repair synthesis                                                                                           |
| HRR25 | HRR25; (RST2); P1850; YPL204W Casein kinase I (serine/threonine/tyrosine protein kinase) involved in DNA repair and meiosis                                                                      |
| RAD7  | RAD7; GTA565; UVS7; J1665; YJR052W Nucleotide excision repair protein involved in G2 repair of inactive genes                                                                                    |

cluster 3 (Return to growth)

|       |                                                                                                                                                   |
|-------|---------------------------------------------------------------------------------------------------------------------------------------------------|
| RAD16 | RAD16; PSO5; YBR0909; YBR114W Nucleotide excision repair protein involved in G2 repair of inactive genes, has DNA helicase domain of Snf2p family |
|-------|---------------------------------------------------------------------------------------------------------------------------------------------------|

|         |                                                                                                                                                                                                      |
|---------|------------------------------------------------------------------------------------------------------------------------------------------------------------------------------------------------------|
| YMR137C | PSO2; (SNM1); YM9375.06; YMR137C DNA repair protein for interstrand crosslinks                                                                                                                       |
| YDR545W | YRF1-1; (YRF1); D3703.4; YDR545W Protein with near identity to the family of subtelomerically-encoded proteins including Yil177p, Yhl049p, and Yjl225p                                               |
| NUC1    | NUC1; HRE329; J0310; YJL208C Nuclease with both DNase and RNase activity, major nuclease of mitochondria                                                                                             |
| CDC2    | CDC2; POL3; TEX1; HPR6; MUT7; D2366; YDL102W DNA polymerase delta large subunit                                                                                                                      |
| FOB1    | FOB1; HRM1; YD9727.06; YDR110W Protein required for blocking the replication fork, for recombinational hotspot activity at the HOT1 site in rDNA, and for expansion and contraction of rDNA repeats  |
| YGL150C | INO80; G1880; YGL150C Member of the Snf2p-like family of probable DNA helicases                                                                                                                      |
| HAM1    | HAM1; J1811; YJR069C Protein controlling 6-N-hydroxylaminopurine sensitivity and mutagenesis                                                                                                         |
| RAD10   | RAD10; UVS14; YML095C Component of the nucleotide excision repairosome, homolog of mammalian ERCC-1 gene product                                                                                     |
| YBR223C | YBR223C; TDP1; YBR1520 Tyrosyl-DNA phosphodiesterase, involved in DNA repair                                                                                                                         |
| PAN2    | PAN2; G3165; YGL094C Component of Pab1p-stimulated poly(A) ribonuclease                                                                                                                              |
| THI4    | THI4; MOL1; ESP35; G6620; YGR144W Thiamine-repressed protein essential for growth in the absence of thiamine                                                                                         |
| RFC2    | RFC2; CST15; J1808; YJR068W Replication factor C, second subunit, homologous to human 37 kDa subunit                                                                                                 |
| SIR3    | SIR3; MAR2; CMT1; STE8; L9753.10; YLR442C Protein involved in maintenance of silencing of HMR, HML, and telomeres, member of the AAA+ family of putative ATPases                                     |
| RFC5    | RFC5; YBR0810; YBR087W Replication factor C, 40 kDa subunit                                                                                                                                          |
| RAD55   | RAD55; XS9; D4426; YD8554.09; YDR076W Component of recombinosome complex involved in meiotic recombination and recombinational repair with Rad57p promotes DNA strand exchange by Rad51p recombinase |
| CCE1    | CCE1; (MGT1); YKL164; YKL011C Cruciform cutting endonuclease                                                                                                                                         |
| TOP3    | TOP3; EDR1; L8083.3; YLR234W DNA topoisomerase III, relaxes negatively (but not positively) supercoiled DNA                                                                                          |
| RFC3    | RFC3; N0533; YNL0533; YNL290W Replication factor C, 40 kDa subunit, member of the DEAD box family of putative helicase proteins                                                                      |
| YHR081W | YHR081W Protein of unknown function                                                                                                                                                                  |
| MSH1    | MSH1; YHR120W Protein involved in mitochondrial DNA repair homolog of E. coli MutS                                                                                                                   |
| YNL133C | FYV6; N1215; N1850; YNL133C Protein required for viability following exposure to toxin                                                                                                               |
| YER160C | RAD3; REM1; UVS4; YER171W DNA helicase component of RNA polymerase II transcription initiation factor TFIIH (factor b), also a component of the nucleotide excision repairosome                      |
| RAD3    |                                                                                                                                                                                                      |
| RFC4    | RFC4; O0923; YOL094C Replication factor C, 37 kDa subunit                                                                                                                                            |
| CTF4    | CTF4; POB1; CHL15; P9659.7; YPR135W Protein required for DNA synthesis, binds DNA polymerase alpha                                                                                                   |
| YER116C | SLX8; YER116C Subunit of Hex3p-Slx8p complex, required for cell growth in the absence of SGS1 or TOP3                                                                                                |
| RAD27   | RAD27; RTH1; ERC11; (FEN1); YKL510; YKL113C Single-stranded DNA endonuclease and 5'-3' exonuclease that functions in the MSH2-MLH1-PMS1-dependent mismatch repair system                             |



|         |                                                                                                                                                                                                         |
|---------|---------------------------------------------------------------------------------------------------------------------------------------------------------------------------------------------------------|
| MSI1    | MSI1; CAC3; YBR1406; YBR195C Chromatin assembly complex, subunit 3, involved in both nucleosome assembly linked with DNA replication and negative regulation of the RAS pathway, has WD (WD-40) repeats |
| YHR167W | THP2; YHR167W Protein with possible roles in transcription and recombination                                                                                                                            |

cluster 4 (transient)

|      |                                                                                                                       |
|------|-----------------------------------------------------------------------------------------------------------------------|
| SOH1 | SOH1; G2864; YGL127C Protein that allows hpr1 null mutant to grow at 37 deg                                           |
| RPH1 | RPH1; YMR137C DNA damage-responsive repressor of PHR1, contains two C2H2-type zinc finger domains                     |
| NSE1 | NSE1, YLR007W; Protein that may function with Smc5p and Rhc18p in a complex required for DNA repair and proliferation |

Supplementary Table S3: Expression of mitotic cell cycle regulated genes during RTG

Some examples of cell cycle regulated genes (identified by Spellman et al., 1998) during M/G1, G1, S/G2 and G2/M.

In each of these groups, some of the genes are induced and some are repressed/non induced during RTG.

Also, some examples are given for genes that are induced during the S-phase of the mitotic cell cycle (Spellman et al., 1998) and are induced during RTG only when the transfer was done early enough (2 hours in SPM) but not later.

| M/G1                            |                               | G1                          |                                 | S/G2                          |                                   | G2/M                              |                               | S                                              |
|---------------------------------|-------------------------------|-----------------------------|---------------------------------|-------------------------------|-----------------------------------|-----------------------------------|-------------------------------|------------------------------------------------|
| M/G1 genes repressed during RTG | M/G1 genes induced during RTG | G1 genes induced during RTG | G1 genes not induced during RTG | S/G2 genes Induced during RTG | S/G2 genes not induced during RTG | G2/M genes not induced during RTG | G2/M genes induced during RTG | Induced during RTG only at early transfer time |
| <i>YGP1</i>                     | <i>YOR066W</i>                | <i>YHL049C</i>              | <i>YBR071W</i>                  | <i>ARG1</i>                   | <i>YOR391C</i>                    | <i>IDH1</i>                       | <i>PDR5</i>                   | <i>HHF1</i>                                    |
| <i>YFL044C</i>                  | <i>HXT4</i>                   | <i>RFC4</i>                 | <i>QRI1</i>                     | <i>ASN2</i>                   | <i>CLB4</i>                       | <i>YBR242W</i>                    | <i>YIL011W</i>                | <i>HHF2</i>                                    |
| <i>YNL134C</i>                  | <i>MCM3</i>                   | <i>CDC2</i>                 | <i>SUR1</i>                     | <i>BAT1</i>                   | <i>YLR373C</i>                    | <i>NUF2</i>                       | <i>YOL014W</i>                | <i>HHT1</i>                                    |
| <i>YOR264W</i>                  | <i>YHR022C</i>                | <i>RAD27</i>                | <i>GPH1</i>                     | <i>YGL101W</i>                | <i>YER018C</i>                    | <i>NDI1</i>                       | <i>YPR013C</i>                | <i>HTB2</i>                                    |
| <i>YBR296C</i>                  | <i>YDR157W</i>                | <i>YAR003W</i>              | <i>YPL267W</i>                  | <i>YCK1</i>                   | <i>YKL035W</i>                    | <i>YNL171C</i>                    | <i>PFK1</i>                   | <i>HHT2</i>                                    |
| <i>YOR052C</i>                  | <i>HXT7</i>                   | <i>POL12</i>                | <i>YEL064C</i>                  | <i>YML125C</i>                | <i>YIL135C</i>                    | <i>APC1</i>                       | <i>YOR258W</i>                | <i>HTB1</i>                                    |
| <i>HXT10</i>                    | <i>RGA1</i>                   | <i>JEM1</i>                 | <i>PBI2</i>                     | <i>CYC1</i>                   | <i>CWP1</i>                       | <i>ARO9</i>                       | <i>YKL172W</i>                | <i>HTA1</i>                                    |
| <i>GFA1</i>                     | <i>YNL078W</i>                | <i>CTF4</i>                 | <i>PDS5</i>                     | <i>ERG3</i>                   | <i>CHS6</i>                       | <i>YFR039C</i>                    | <i>YPR156C</i>                | <i>HTA2</i>                                    |
| <i>YOR242C</i>                  | <i>UTR2</i>                   | <i>YNL231C</i>              | <i>RFA1</i>                     | <i>YDR346C</i>                | <i>YER042W</i>                    | <i>WSC4</i>                       | <i>STP4</i>                   | <i>PMI40</i>                                   |
| <i>DBI56</i>                    | <i>YJL159W</i>                | <i>YGR151C</i>              | <i>LAP4</i>                     | <i>SNQ2</i>                   | <i>YLR209C</i>                    | <i>DIP5</i>                       | <i>CLN3</i>                   | <i>EXG2</i>                                    |
| <i>SIC1</i>                     | <i>YOR342C</i>                | <i>PMT3</i>                 | <i>YHR110W</i>                  | <i>YGR138C</i>                | <i>YHR146W</i>                    | <i>CAR1</i>                       | <i>YDR033W</i>                | <i>FLR1</i>                                    |
| <i>RNH70</i>                    | <i>YPL014W</i>                | <i>MKC7</i>                 | <i>YKL066W</i>                  | <i>AUR1</i>                   | <i>YDR130C</i>                    | <i>CDC5</i>                       | <i>YLR297W</i>                | <i>HTA3</i>                                    |
| <i>IAH1</i>                     | <i>ROD1</i>                   | <i>RFC5</i>                 | <i>YOR084W</i>                  |                               | <i>VAM7</i>                       | <i>HST3</i>                       | <i>YKR079C</i>                | <i>YET1</i>                                    |
| <i>YGR086C</i>                  | <i>YHB1</i>                   | <i>YLR236C</i>              | <i>YNL208W</i>                  |                               | <i>BUB2</i>                       | <i>CLB1</i>                       | <i>YLR413W</i>                | <i>ERV25</i>                                   |
| <i>YGL037C</i>                  | <i>SKT5</i>                   | <i>YBR089W</i>              | <i>OPY2</i>                     |                               | <i>SCC3</i>                       | <i>CAR2</i>                       | <i>YRO2</i>                   | <i>SLT2</i>                                    |
| <i>GSY1</i>                     |                               | <i>PMT1</i>                 | <i>YLR049C</i>                  |                               | <i>PCL7</i>                       | <i>MOB1</i>                       |                               | <i>YHR098C</i>                                 |
| <i>FAA1</i>                     |                               | <i>TRR1</i>                 | <i>DHS1</i>                     |                               | <i>GLG2</i>                       | <i>YDR276C</i>                    |                               | <i>YJL118W</i>                                 |
| <i>MDG1</i>                     |                               | <i>HSL1</i>                 | <i>CLB6</i>                     |                               | <i>PET8</i>                       | <i>IQG1</i>                       |                               |                                                |
| <i>KAR4</i>                     |                               | <i>YBR007C</i>              | <i>CLB5</i>                     |                               | <i>HOP1</i>                       | <i>YLR084C</i>                    |                               |                                                |
| <i>YIR036C</i>                  |                               | <i>YGL060W</i>              | <i>EPT1</i>                     |                               | <i>PUT1</i>                       | <i>YOL132W</i>                    |                               |                                                |

|                |  |             |                |  |                |                |  |  |
|----------------|--|-------------|----------------|--|----------------|----------------|--|--|
| <i>WTM1</i>    |  | <i>EXG1</i> | <i>CNM1</i>    |  | <i>ORC1</i>    | <i>NCE102</i>  |  |  |
| <i>TIP1</i>    |  | <i>FKS1</i> | <i>YGR153W</i> |  | <i>TUB2</i>    | <i>YLR034C</i> |  |  |
| <i>YBL064C</i> |  |             | <i>YLR343W</i> |  | <i>YDR149C</i> | <i>ASE1</i>    |  |  |
| <i>YBR273C</i> |  |             | <i>SPC98</i>   |  | <i>YLR437C</i> | <i>YLR190W</i> |  |  |
| <i>YBR204C</i> |  |             | <i>PDS1</i>    |  | <i>TPM2</i>    | <i>YBR139W</i> |  |  |
| <i>GLK1</i>    |  |             | <i>KAR3</i>    |  | <i>YLR099C</i> | <i>YML066C</i> |  |  |
|                |  |             |                |  | <i>YOR152C</i> | <i>CDC20</i>   |  |  |
|                |  |             |                |  | <i>YPL141C</i> | <i>YOR383C</i> |  |  |
|                |  |             |                |  | <i>YML058W</i> | <i>SPS4</i>    |  |  |
|                |  |             |                |  | <i>YKL183W</i> | <i>SUT1</i>    |  |  |
|                |  |             |                |  | <i>CDC10</i>   | <i>YOR273C</i> |  |  |
|                |  |             |                |  | <i>GAP1</i>    | <i>YBR094W</i> |  |  |
|                |  |             |                |  | <i>DBF20</i>   | <i>SPO12</i>   |  |  |
|                |  |             |                |  | <i>NUM1</i>    | <i>YMR253C</i> |  |  |
|                |  |             |                |  |                | <i>SKN1</i>    |  |  |
|                |  |             |                |  |                | <i>YHR151C</i> |  |  |
|                |  |             |                |  |                | <i>YGR284C</i> |  |  |
|                |  |             |                |  |                | <i>YMR031C</i> |  |  |
|                |  |             |                |  |                | <i>YHL026C</i> |  |  |
|                |  |             |                |  |                | <i>KIN3</i>    |  |  |
|                |  |             |                |  |                | <i>YDR380W</i> |  |  |
|                |  |             |                |  |                | <i>YFL006W</i> |  |  |

Spellman, P. T., Sherlock, G., Zhang, M. Q., Iyer, V. R., Anders, K., Eisen, M. B., Brown, P. O., Botstein, D., and Futcher, B. (1998). Comprehensive identification of cell cycle-regulated genes of the yeast *Saccharomyces cerevisiae* by microarray hybridization. *Mol Biol Cell* 9, 3273-3297.

Supplementary Table S4: genes that are induced during RTG

The average pattern ( $\log_2$ ratio) is plotted upon transfer to YPD (which was followed for 5, 20 and 40 minutes after the transfer). The genes in the group, along with a one line description, are indicated.

Template genes used to create this group are: *RFC2*, *YJL200C*, *YLR413W*, *YGR105W*, *YPR044C*, *YJL188C*, *YBR239C*, *URA5*, *VMA21*, *CTF4*, *YGL016W*, *YGL042C*, *SIR3*, *YLR344W*

| Group 6                                                                                                                                                                                                                                          | 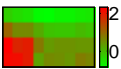 |
|--------------------------------------------------------------------------------------------------------------------------------------------------------------------------------------------------------------------------------------------------|-----------------------------------------------------------------------------------|
| ERP2; (FUN54); YAL007C Component of COPII-coated vesicles, forms an Erp1p-Erp2p-Emp24p-Erv25p heteromeric complex, has similarity to Emp24p and Erv25p                                                                                           |                                                                                   |
| ECM1; (SIM1); YAL059W Protein possibly involved in cell wall structure or biosynthesis                                                                                                                                                           |                                                                                   |
| YBL070C; YBL0616 Protein of unknown function                                                                                                                                                                                                     |                                                                                   |
| BOI1; (BOB1); YBL0717; YBL085W Bem1p-binding protein, has an SH3 domain and a PH (pleckstrin) domain                                                                                                                                             |                                                                                   |
| YBR089W; YBR0811a Protein of unknown function, questionable ORF                                                                                                                                                                                  |                                                                                   |
| YBR197C; YBR1409 Protein of unknown function                                                                                                                                                                                                     |                                                                                   |
| YBR239C; YBR1622 Protein with similarity to transcription factors, has Zn[2]-Cys[6] fungal-type binuclear cluster domain in the N-terminal region                                                                                                |                                                                                   |
| DUT1; YBR1705; YBR252W dUTP pyrophosphatase, converts dUTP to dUMP thereby preventing uracil incorporation into DNA                                                                                                                              |                                                                                   |
| RER1; YCL001W Component of COPII-coated vesicles, involved in retrieval of endoplasmic reticulum membrane proteins from the early Golgicompartment                                                                                               |                                                                                   |
| HIS4; YCL183; YCL030C Phosphoribosyl-AMP cyclohydrolase / phosphoribosyl-ATP pyrophosphohydrolase / histidinol dehydrogenase, second, third, and tenth steps of histidine biosynthesis pathway                                                   |                                                                                   |
| YCR087W Protein of unknown function                                                                                                                                                                                                              |                                                                                   |
| YDL060W; D2544 Protein of unknown function                                                                                                                                                                                                       |                                                                                   |
| YHM1; (SHM1); D1214; YDL198C Protein of the mitochondrial carrier (MCF) family that when overexpressed suppresses loss of Abf2p                                                                                                                  |                                                                                   |
| NHP2; D1045; YDL208W Nucleolar protein required in association with H/ACA snoRNAs for ribosomal RNA pseudouridylation                                                                                                                            |                                                                                   |
| RLI1; YD6652.03; YDR091C Putative ortholog of human Rnase L inhibitor (RLI) of the interferon-regulated 2-5A pathway, putative ortholog of C.elegans Y39E4B.1, member of the non-transporter group in the ATP-binding cassette (ABC) superfamily |                                                                                   |
| MKC7; YPS2; YD8358.01; YD2943.03; YDR144C Aspartyl protease found in the periplasmic space, has similarity to Yps1p and Bar1p                                                                                                                    |                                                                                   |
| ASP1; D9798.6; YDR321W Asparaginase, (L-asparagine aminohydrolase I), intracellular isozyme that converts asparagine to aspartate and ammonia                                                                                                    |                                                                                   |
| TIF35; D9461.16; YDR429C Translation initiation factor eIF3, p33 subunit, contains an RRM (RNA recognition motif) domain                                                                                                                         |                                                                                   |
| YEL018W Protein of unknown function                                                                                                                                                                                                              |                                                                                   |
| UTR2; CRH2; SYGP-ORF18; YEL040W Cell wall protein                                                                                                                                                                                                |                                                                                   |
| PTC2; YER089C Protein serine/threonine phosphatase of the PP2C family, negative regulator of unfolded protein response (UPR) pathway                                                                                                             |                                                                                   |
| AST2; YER101C Protein with similarity to Ast1p                                                                                                                                                                                                   |                                                                                   |
| KAP122; PDR6; G3713; YGL016W Nuclear transport factor, member of karyopherin-beta family                                                                                                                                                         |                                                                                   |
| YGL042C; G3555 Protein with similarity to rat Na <sup>+</sup> /Ca <sup>2+</sup> exchanger NCX2 PIR:A54139                                                                                                                                        |                                                                                   |
| YGL144C; ROG1; G2525! Protein of unknown function, has strong similarity to Ydl109p and Ydr444p                                                                                                                                                  |                                                                                   |
| VMA21; G5943; YGR105W Protein required for vacuolar H(+)-ATPase (V-ATPase) assembly                                                                                                                                                              |                                                                                   |

|                                                                                                                                                                                   |
|-----------------------------------------------------------------------------------------------------------------------------------------------------------------------------------|
| THI4; MOL1; ESP35; G6620; YGR144W Thiamine-repressed protein essential for growth in the absence of thiamine                                                                      |
| YGR169C; G7062 Protein of unknown function                                                                                                                                        |
| HGH1; G7538; YGR187C Protein with similarity to human HMG1 and HMG2 proteins                                                                                                      |
| PHO81; (SPL1); ORF1178; G8567; YGR233C Cyclin-dependent kinase (CDK) inhibitor for Pho80p-Pho85p cyclin-dependent protein kinase complex, positive regulator of phosphate pathway |
| PDR13; H8025.17; YHR064C Pleiotropic drug resistance protein, member of the Hsp70 family of heat shock proteins                                                                   |
| RPL40A; UBI1; CEP52A; CST2; YIL148W Fusion protein whose N-terminal half is ubiquitin and whose C-terminal half is ribosomal protein L40(rat L40), identical to Rpl40Bp           |
| YIR035C Protein with similarity to proteins of the human corticosteroid 11-beta-dehydrogenase and short-chain alcohol dehydrogenase family                                        |
| BUD19; J0403; YJL188C Protein of unknown function questionable ORF                                                                                                                |
| YJL200C; J0327 Protein with similarity to aconitase, has potential mitochondrial transit peptide                                                                                  |
| ILV3; (ISO1); VAL J1450; YJR016C Dihydroxyacid dehydratase (DAD), third step in valine and isoleucine biosynthesis pathway                                                        |
| YJR041C; GTF1174; J1622 Protein with similarity to Podospora anserina NADH dehydrogenase chain 4                                                                                  |
| RFC2; CST15; J1808; YJR068W Replication factor C, second subunit, homologous to human 37 kDa subunit                                                                              |
| NMD5; J2112; KAP119; YJR132W Member of the karyopherin-beta family involved in nuclear transport                                                                                  |
| YKL051W; YKL303 Protein of unknown function                                                                                                                                       |
| DPH2; YKL191W Diphtheria toxin resistance protein, required for diphthamide biosynthesis                                                                                          |
| RPL40B; UBI2; CEP52B; CST1; YKR414; YKR094C Fusion protein comprised of ribosomal protein L40 (C-terminal half) and ubiquitin(N-terminal half), (rat L40), identical to Rpl40Ap   |
| YLL044W; L0725 Protein of unknown function                                                                                                                                        |
| YLL059C; L0563 Protein of unknown function                                                                                                                                        |
| YLR042C; L1929 Putative GPI-anchored protein of unknown function                                                                                                                  |
| BUD28; L2171; YLR062C Protein that may be involved in bud site selection in diploid cells                                                                                         |
| YLR076C; L2345 Protein of unknown function                                                                                                                                        |
| SLS1; L3159; YLR139C Protein involved in mitochondrial metabolism                                                                                                                 |
| YLR179C; L9470.20 Protein with similarity to Tfs1p Cdc25p-dependent nutrient- and ammonia-response protein                                                                        |
| SIK1; NOP56; L8167.9; YLR197W Nucleolar protein component of box C/D snoRNPs, which are necessary for 2'-O-methylation of ribosomal RNAs                                          |
| YLR198C Protein of unknown function                                                                                                                                               |
| RPS25B; RPS31B; L8300.10; YLR333C Ribosomal protein S25B (yeast S31; YS23; rp45; rat S25), identical to Rps25Ap                                                                   |
| RPL26A; L8300.4; YLR344W Ribosomal protein L26 (yeast L33; YL33; rat L26), nearly identical to Rpl26Bp                                                                            |
| RPS29A; L8084.11; YLR388W Ribosomal protein S29 (yeast S36; YS29; rat S29), similar to Rps29Bp                                                                                    |
| AFG2; DRG1; L8084.16; YLR397C Member of the AAA family of ATPases, has similarity to mammalian valosin-containing protein (VCP)                                                   |
| YLR401C; L8084.19 Protein with weak similarity to R. capsulatus protein nifR3                                                                                                     |
| YLR413W; L9931.4 Protein of unknown function, induced during anaerobic growth                                                                                                     |
| SIR3; MAR2; CMT1; STE8; L9753.10; YLR442C Protein involved in maintenance of silencing of HMR, HML, and telomeres, member of the AAA+ family of putative ATPases                  |
| FPR4; L9324.3; YLR449W Nucleolar peptidylprolyl cis-trans isomerase (PPIase)                                                                                                      |
| IMD4; YM9958.06; YML056C Protein with similarity to inosine-5'-monophosphate dehydrogenase                                                                                        |
| RPL6A; YML073C Ribosomal protein L6 (yeast L17A; YL16A; human L6), nearly identical to Rpl6Bp                                                                                     |
| URA5; PYR5; YM8339.13; YML106W Orotate phosphoribosyltransferase 1, catalyzes the fifth step in the pyrimidine biosynthesis pathway                                               |

|                                                                                                                                                                 |
|-----------------------------------------------------------------------------------------------------------------------------------------------------------------|
| NIP1; YMR309C Subunit of translation initiation complex eIF3, also required for nuclear import has weak similarity to Nsr1p                                     |
| YOL014W; O2333 Protein of unknown function                                                                                                                      |
| YOL037C; O2101 Protein of unknown function                                                                                                                      |
| SPE2; O1275; YOL052C S-adenosylmethionine decarboxylase, required for biosynthesis of pantothenic acid, post-translationally cleaved into alpha and beta chains |
| ROD1; OR26.08; YOL303.7; O2627; YOR018W Protein that mediates resistance to o-dinitrobenzene (O-DNB)                                                            |
| CKA2; O2810; YOR29-12; YOR061W Casein kinase II (Protein kinase CK2), catalytic (alpha-prime) subunit                                                           |
| CAF20; CAP20; CAF2; O5453W; YOR276W mRNA cap-binding protein (eIF4F) 20K subunit                                                                                |
| YOR376W; O6736 Protein with weak similarity to Na <sup>+</sup> /K <sup>+</sup> -exchanging ATPases                                                              |
| EGD1; CST25; P7102.13; YPL037C Beta subunit of the nascent polypeptide-associated complex                                                                       |
| YPR044C Protein of unknown function                                                                                                                             |
| CTF4; POB1; CHL15; P9659.7; YPR135W Protein required for DNA synthesis, binds DNA polymerase alpha                                                              |

Supplementary Table S5: genes that are induced immediately during RTG

The average pattern ( $\log_2$ ratio) is plotted upon transfer to YPD (which was followed for 5, 20 and 40 minutes after the transfer). The genes in the group, along with a one line description, are indicated.

Template genes used to create this group are: *CLN3*, *YJL109C*, *STD1*, *YLR432W*, *YOR051C*, *DRS1*

| Group 5                                                                                                                                                         | 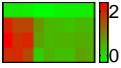 |
|-----------------------------------------------------------------------------------------------------------------------------------------------------------------|-----------------------------------------------------------------------------------|
| YAL019W; CST24; YAL001; FUN30 Protein of the Snf2p family with a DNA-dependent ATPase domain, involved in resistance to UV radiation                            |                                                                                   |
| POP5; FUN53; YAL033W Subunit of both RNase P and RNase MRP, which are involved in tRNA processing and 5.8S rRNA processing, respectively                        |                                                                                   |
| YAL036C; FUN11 Protein with similarity to <i>Xenopus laevis</i> DRG GTP-binding protein                                                                         |                                                                                   |
| CLN3; DAF1; WHI1; CST7; FUN10; YAL040C G1/S-specific cyclin that interacts with Cdc28p protein kinase to control events at START                                |                                                                                   |
| URA7; YBL0410; YBL039C CTP synthase final step in pyrimidine biosynthesis pathway                                                                               |                                                                                   |
| YBL054W; (YBL0509) Protein of unknown function                                                                                                                  |                                                                                   |
| RER2; YBR0107; YBR002C Cis-prenyltransferase, involved in dolichol synthesis                                                                                    |                                                                                   |
| PHO3; YBR0813; YBR092C Acid phosphatase, constitutive, thiamine-binding protein of the periplasmic space                                                        |                                                                                   |
| PHO88; YBR0835; YBR106W Membrane protein involved in inorganic phosphate transport                                                                              |                                                                                   |
| YBR144C; YBR1121 Protein of unknown function                                                                                                                    |                                                                                   |
| RIB7; YBR1203; YBR153W HTP reductase, second step in the riboflavin biosynthesis pathway                                                                        |                                                                                   |
| SMY2; YBR1233; YBR172C Protein of unknown function, suppresses myo2-66, sec22, bet1, sec16-3, spt15, and yrb1-51 mutants when overexpressed                     |                                                                                   |
| YPC1; YBR1305; YBR183W Alkaline ceramidase                                                                                                                      |                                                                                   |
| YBR238C; YBR1608 Protein of unknown function                                                                                                                    |                                                                                   |
| ENP1; MEG1; YBR1635; YBR247C Essential nuclear protein with effects on N-glycosylation of proteins in the secretory pathway                                     |                                                                                   |
| DUT1; YBR1705; YBR252W dUTP pyrophosphatase, converts dUTP to dUMP thereby preventing uracil incorporation into DNA                                             |                                                                                   |
| YBR271W; YBR1739 Putative SAM-dependent methyltransferase                                                                                                       |                                                                                   |
| SRO9; SYS2; YCL037C Protein associated with ribosomes, has a potential role in translational accuracy, member of a subfamily of La motif proteins               |                                                                                   |
| KRR1; YCL059C Protein essential for cell division and spore germination                                                                                         |                                                                                   |
| YCR016W Protein of unknown function                                                                                                                             |                                                                                   |
| YCR060W Protein with similarity to stress inducible protein Sti1p, has tetratricopeptide (TPR) repeats                                                          |                                                                                   |
| YCR072C Protein of unknown function, member of WD (WD-40) repeat family                                                                                         |                                                                                   |
| NOP1; D2870; YDL014W Fibrillarin, protein associated with small nucleolar RNA (snoRNA) and required for 35S rRNA processing and methylation                     |                                                                                   |
| PRM7; D2723; YDL039C Protein of unknown function                                                                                                                |                                                                                   |
| KRE26; D2717; YDL041W Protein of unknown function                                                                                                               |                                                                                   |
| STP4; D2690; YDL048C Protein with strong similarity to Stp1p, which is involved in tRNA splicing and branched-chain amino acid uptake                           |                                                                                   |
| YDL060W; D2544 Protein of unknown function                                                                                                                      |                                                                                   |
| CDC2; POL3; TEX1; HPR6; MUT7; D2366; YDL102W DNA polymerase delta large subunit                                                                                 |                                                                                   |
| RRP42; D2315; YDL111C Component of exosome 3'-5' exoribonuclease complex that is required for 3' processing of ribosomal 5.8S rRNA, of snoRNAs, and of U4 snRNA |                                                                                   |
| YDL166C; FAP7; D1487 Essential protein important for Skn7p-dependent transcription of target genes during oxidative stress                                      |                                                                                   |
| HEM3; D1057; YDL205C Porphobilinogen deaminase (pre-uroporphyrinogen synthase), catalyzes the third step in porphyrin biosynthesis pathway                      |                                                                                   |
| NHP2; D1045; YDL208W Nucleolar protein required in association with H/ACA snoRNAs for                                                                           |                                                                                   |

|                                                                                                                                                                                                               |
|---------------------------------------------------------------------------------------------------------------------------------------------------------------------------------------------------------------|
| ribosomal RNA pseudouridylation                                                                                                                                                                               |
| KRS1; GCD5; YD9673.09; D3457; YDR037W Lysyl-tRNA synthetase, cytoplasmic                                                                                                                                      |
| RRP1; YD8554.20; D4478; YDR087C Protein involved in maturation of 25S rRNA                                                                                                                                    |
| YDR093W; YD8557.01 Member of the Drs2p family of the P-type ATPase superfamily                                                                                                                                |
| FOB1; HRM1; YD9727.06; YDR110W Protein required for blocking the replication fork, for recombinational hotspot activity at the HOT1 site in rDNA, and for expansion and contraction of rDNA repeats           |
| PSL10; YD9302.01; YD9727.21; YDR126W Protein of unknown function                                                                                                                                              |
| SAN1; YD2943.02; YDR143C Protein that may antagonize the function of Spt16p and Sir4p                                                                                                                         |
| YDR152W; YD8358.08 Protein of unknown function                                                                                                                                                                |
| RPA14; YD8358.11; YDR156W RNA polymerase I subunit A14                                                                                                                                                        |
| YDR157W Protein of unknown function                                                                                                                                                                           |
| YDR210W; YD8142A.07; YD8142.07 Protein of unknown function                                                                                                                                                    |
| YDR248C; YD8419.15 Protein with similarity to E. coli gluconate kinase gntV                                                                                                                                   |
| YDR266C; D9954.10 Protein of unknown function, contains a RING finger domain                                                                                                                                  |
| YDR365C; D9481.12 Protein of unknown function                                                                                                                                                                 |
| YDR398W; D9509.17 Protein of unknown function                                                                                                                                                                 |
| HPT1; BRA6; D9509.18; YDR399W Hypoxanthine-guanine phosphoribosyl transferase                                                                                                                                 |
| YDR459C; D8035.3 Protein of unknown function, has similarity to Erf2p                                                                                                                                         |
| YDR514C; D9719.19 Protein of unknown function                                                                                                                                                                 |
| YEL018W Protein of unknown function                                                                                                                                                                           |
| ANP1; GEM3; CAX1; MNN8; MCD2; SYGP-ORF28; YEL036C Protein of the cis Golgi with a role in retention of glycosyltransferases in the Golgi, subunit of the Anp1p-Hoc1p-Mnn11p-Mnn9p mannosyltransferase complex |
| YEL045C; SYGP-ORF33 Protein of unknown function, has motifs typical of ATP/GTP binding sites                                                                                                                  |
| YEL048C; SYGP-ORF36 Protein of unknown function                                                                                                                                                               |
| YER028C Protein with similarity to Mig2p, Tup1p-dependent and glucose-dependent transcriptional repressor with unknown function                                                                               |
| KRE31; YER082C Protein of unknown function, has two tandem C2H2-type zinc fingers, has one WD (WD-40) domain                                                                                                  |
| ILV1; (ISO1); YER086W Serine and threonine dehydratase (anabolic), first step in isoleucine biosynthesis pathway                                                                                              |
| PTC2; YER089C Protein serine/threonine phosphatase of the PP2C family, negative regulator of unfolded protein response (UPR) pathway                                                                          |
| LCP5; SYGP-ORF43; YER127W Protein required for ribosomal RNA processing                                                                                                                                       |
| YGL042C; G3555 Protein with similarity to rat Na <sup>+</sup> /Ca <sup>2+</sup> exchanger NCX2 PIR:A54139                                                                                                     |
| YGL108C; G3070 Protein of unknown function                                                                                                                                                                    |
| RAI1; NRE387; G0580; YGL246C Protein that binds and enhances function of nuclear exonuclease Rat1p                                                                                                            |
| PAC10; GIM2; G4579; YGR078C Prefoldin subunit 3, component of the Gim protein complex that promotes formation of functional alpha- and gamma-tubulin, and actin                                               |
| YGR103W; G5933 Nuclear protein of unknown function with similarity to zebrafish pescadillo                                                                                                                    |
| FYV13; G7004; YGR160W Protein of unknown function                                                                                                                                                             |
| YGR179C; G7144; OKP1 Component of centromere/kinetochore-associated protein network                                                                                                                           |
| HGH1; G7538; YGR187C Protein with similarity to human HMG1 and HMG2 proteins                                                                                                                                  |
| SER2; LST3; PSP G7744; YGR208W Phosphoserine phosphatase involved in synthesis of serine from 3-phosphoglycerate                                                                                              |
| PRS3; SIW17; YHL011C; PRPS3 Phosphoribosylpyrophosphate synthetase (ribose-phosphate pyrophosphokinase II) component of yeast 20S proteasome, with a role in cell cycle regulation                            |
| RSC30; YHR056C Protein of unknown function, encoded from the CUP1A and CUP1B repeat region                                                                                                                    |
| YHR085W Protein of unknown function                                                                                                                                                                           |
| HXT4; LGT1; RAG1; YHR092C Moderate- to low-affinity hexose transporter, member of the hexose transporter family of the major facilitator superfamily (MFS)                                                    |
| HXT1; YHR094C Low-affinity hexose transporter, member of the hexose transporter family of the major facilitator superfamily (MFS), induced by glucose only at high concentration                              |
| MSH1; YHR120W Protein involved in mitochondrial DNA repair homolog of E. coli MutS                                                                                                                            |
| DBP8; YHR169W Protein with similarity to DEAD box family of RNA helicases                                                                                                                                     |



|                                                                                                                                                                                        |
|----------------------------------------------------------------------------------------------------------------------------------------------------------------------------------------|
| YHR196W Protein of unknown function                                                                                                                                                    |
| HIS6; YI3299.11; YIL020C Phosphoribosyl imidazolecarboxamide isomerase                                                                                                                 |
| KTR7; YI9910.11; YIL085C Putative mannosyltransferase of the KRE2 family                                                                                                               |
| PAN6; YIL145C Protein required for synthesis of pantothenic acid, has similarity to E. coli pantoate beta-alanine ligase                                                               |
| YIL175W Protein of unknown function, putative pseudogene                                                                                                                               |
| YJL109C; J0808 Protein with weak similarity to Drs2p                                                                                                                                   |
| GEF1; STP24; CLCY1; (CLC1); GTC779; J1616; YJR040W Voltage-gated chloride channel, has effects on intracellular iron metabolism                                                        |
| YJR041C; GTF1174; J1622 Protein with similarity to Podospira anserina NADH dehydrogenase chain 4                                                                                       |
| NUP85; RAT9; GTC744; J1624; YJR042W Nuclear pore protein                                                                                                                               |
| HAM1; J1811; YJR069C Protein controlling 6-N-hydroxylaminopurine sensitivity and mutagenesis                                                                                           |
| NMD5; J2112; KAP119; YJR132W Member of the karyopherin-beta family involved in nuclear transport                                                                                       |
| MRT4; YKL160; YKL009W Protein involved in mRNA turnover                                                                                                                                |
| YKL027W Protein with similarity to E. coli molybdopterin-converting factor                                                                                                             |
| MAE1; YKL029C Mitochondrial malate dehydrogenase (NADP+, oxaloacetate-decarboxylating)                                                                                                 |
| YKL030W; (YKL243) Protein of unknown function questionable ORF                                                                                                                         |
| JA2; DHR2; YKL408; YKL078W RNA helicase of DEAH box family, possible pre-mRNA splicing factor                                                                                          |
| YKL099C; YKL449 Protein of unknown function                                                                                                                                            |
| YKL102C; YKL454 Protein of unknown function                                                                                                                                            |
| AAT1; YKL461; YKL106W Putative aspartate aminotransferase, mitochondrial                                                                                                               |
| OAC1; PMT (PMT1); YKL522; YKL120W Mitochondrial oxaloacetate transporter, member of the mitochondrial carrier (MCF) family                                                             |
| RRN3; YKL125W RNA polymerase I transcription factor                                                                                                                                    |
| EBP2; YKL636; YKL172W Protein involved in pre-rRNA processing and ribosomal subunit assembly                                                                                           |
| DPH2; YKL191W Diphtheria toxin resistance protein, required for diphthamide biosynthesis                                                                                               |
| RPC37; YKR025W RNA polymerase III, C37 subunit                                                                                                                                         |
| GCN3; AAS2; YKR026C Translation initiation factor eIF2B (guanine nucleotide exchange factor), 34 kDa (alpha) subunit                                                                   |
| YKR043C Protein with similarity to phosphoglycerate mutase                                                                                                                             |
| YKR060W Protein of unknown function                                                                                                                                                    |
| YKR071C Protein of unknown function                                                                                                                                                    |
| YKR079C Protein of unknown function                                                                                                                                                    |
| SRP40; YKR412; YKR092C Nucleolar protein, suppressor of rpc40 and rpb10 mutations                                                                                                      |
| DRS1; L1345; YLL008W RNA helicase of the DEAD box family involved in rRNA biogenesis                                                                                                   |
| YLL044W; L0725 Protein of unknown function                                                                                                                                             |
| YLR002C; L1392 Protein of unknown function                                                                                                                                             |
| YLR022C; L1722 Protein of unknown function                                                                                                                                             |
| YLR065C; L2180 Protein of unknown function                                                                                                                                             |
| BUD20; L2337; YLR074C Protein of unknown function, has a single C2H2-type zinc finger                                                                                                  |
| DIP2; L9233.1; L3116; YLR129W Dom34p-interacting protein, has WD (WD-40) repeats                                                                                                       |
| SPE4; L9634.5; L3305; YLR146C Spermine synthase (spermidine aminopropyltransferase), catalyzes the final step in polyamine biosynthesis, required for biosynthesis of pantothenic acid |
| ASP3B; (ASP3); L9632.7; YLR157C L-asparaginase II, extracellular                                                                                                                       |
| YLR186W; L9470.5 Protein of unknown function                                                                                                                                           |
| SIK1; NOP56; L8167.9; YLR197W Nucleolar protein component of box C/D snoRNPs, which are necessary for 2'-O-methylation of ribosomal RNAs                                               |
| YLR198C Protein of unknown function                                                                                                                                                    |
| YLR222C; CST29; L8083.8 Protein of unknown function, overproduction causes chromosome instability and increased mitotic recombination, contains WD (WD-40) repeats                     |
| THI7; THI10; UPL3; L8083.2; YLR237W Thiamine transport protein                                                                                                                         |
| DBP9; L9328.3; YLR276C Protein with similarity to DEAD box RNA helicases                                                                                                               |
| GSP1; CNR1; RAN CST17; L8003.19; YLR293C Ran, a GTP-binding protein of the ras superfamily involved in trafficking through nuclear pores                                               |

|                                                                                                                                                                                                    |
|----------------------------------------------------------------------------------------------------------------------------------------------------------------------------------------------------|
| EXG1; SCW6; BGL1; L8003.3; YLR300W Exo-beta-1,3-glucanase (I/II) major isoform involved in cell wall beta-glucan assembly                                                                          |
| FKS1; GLS1; CWH53; ETG1; CND1; GSC1; PBR1; PBS1; L8300.6; YLR342W Component of beta-1,3-glucan synthase, probably functions as an alternate subunit with Gsc2p with which it has strong similarity |
| YLR401C; L8084.19 Protein with weak similarity to <i>R. capsulatus</i> protein nifR3                                                                                                               |
| YLR405W; L8084.2 Protein of unknown function                                                                                                                                                       |
| YLR408C; L8084.21 Protein of unknown function                                                                                                                                                      |
| YLR409C; L8084.22 Protein of unknown function, has WD (WD-40) repeats                                                                                                                              |
| IMD3; L9753.4; YLR432W Protein highly similar to Imd2p and inosine-5'-monophosphate dehydrogenase of human and <i>E. coli</i>                                                                      |
| YLR435W; L9753.3 Protein of unknown function, may be involved with protein synthesis                                                                                                               |
| YML014W; YM9571.04 Protein with similarity to Diphtheria toxin resistance protein                                                                                                                  |
| YML018C Protein of unknown function                                                                                                                                                                |
| IMD4; YM9958.06; YML056C Protein with similarity to inosine-5'-monophosphate dehydrogenase                                                                                                         |
| ERB1; YM9796.02; YMR049C Protein with possible role in ribosome biogenesis, has similarity to mouse Bop1 growth suppressor, has one WD(WD-40) domain                                               |
| YMR102C Protein of unknown function, contains WD (WD-40) repeats                                                                                                                                   |
| ILV2; SMR1; YM9718.07; YMR108W Acetolactate synthase (acetohydroxyacid synthase), first step in valine and isoleucine biosynthesis pathway                                                         |
| PKR1; YM8564.05; YMR123W Protein of unknown function                                                                                                                                               |
| GUA1; YM8261.11; YMR217W GMP synthetase, catalyzes the amination of xanthine monophosphate to guanine monophosphate in the guanine branch of the purine biosynthesis pathway                       |
| RRN9; YM8156.12; YMR270C Component of the Upstream Activation Factor (UAF) complex, involved in activation of RNA polymerase I                                                                     |
| NIP1; YMR309C Subunit of translation initiation complex eIF3, also required for nuclear import has weak similarity to Nsr1p                                                                        |
| BOP3; N2670; YNL042W Protein of unknown function                                                                                                                                                   |
| YNL110C; N1954 Protein of unknown function, contains one RNA recognition (RRM) domain                                                                                                              |
| RPC19; N1937; YNL113W Shared subunit of RNA polymerases I and III                                                                                                                                  |
| YNL114C; N1934 Protein of unknown function, questionable ORF                                                                                                                                       |
| YNL174W; N1669 Protein of unknown function                                                                                                                                                         |
| POP1; N1285; YNL221C Protein component of both RNase P and RNase MRP, involved in both tRNA maturation (RNase P) and in 5.8S rRNA processing (RNase MRP)                                           |
| POP3; N0586; YNL282W Component of both RNase MRP and RNase P, involved in processing of both rRNA and tRNA precursors                                                                              |
| TRF5; YNL0440; N0440; YNL299W DNA polymerase kappa, required for sister chromatid cohesion                                                                                                         |
| KRI1; N0388; YNL308C Protein required for synthesis of 40S ribosomal subunits, binds Krr1p and has weak similarity to Mgm1p                                                                        |
| URK1; N2050; YNR012W Uridine kinase, converts ATP and uridine to ADP and UMP                                                                                                                       |
| YNR013C; N2052 Protein with similarity to Pho87p and Yjl198p, member of the phosphate permease family of membrane transporters                                                                     |
| YNR020C; N3212 Protein of unknown function                                                                                                                                                         |
| BIO4; N3506; YNR057C Dethiobiotin synthase, component of the biotin biosynthesis pathway                                                                                                           |
| RCL1; O2357; YOL010W Protein required for pre-rRNA processing at cleavage sites A0, A1 and A2, has similarity to RNA 3'-terminal phosphatase                                                       |
| SCM2; TAT2; TAP2; LTG3; SAB2; O2301; YOL020W High affinity tryptophan permease, also transports other aromatic amino acids, alanine and glycine                                                    |
| YOL037C; O2101 Protein of unknown function                                                                                                                                                         |
| PRS5; PRPS5; O1213; YOL061W Phosphoribosylpyrophosphate synthetase (ribose-phosphate pyrophosphokinase)                                                                                            |
| YOR004W; UNB254; O2521 Protein of unknown function                                                                                                                                                 |
| STD1; MSN3; SFS3; O2777; YOR047C Dosage-dependent modulator of glucose repression increased dosage restores invertase expression insnf4 mutants                                                    |
| YOR051C; YOR29-02; O2793 Nuclear protein of unknown function                                                                                                                                       |
| RGS2; YOR3224; O3224; YOR107W Negative regulator of glucose-induced cAMP signaling pathway                                                                                                         |
| ORT1; ARG11; O3299; YOR3299; YOR130C Ornithine transport protein of mitochondria involved in arginine metabolism, member of the mitochondrial carrier (MCF) family                                 |

|                                                                                                                          |
|--------------------------------------------------------------------------------------------------------------------------|
| YOR169C; O3605 Protein of unknown function                                                                               |
| YOR203W; O4833 Protein of unknown function                                                                               |
| YOR206W; O4843; YOX001 Protein of unknown function                                                                       |
| RPB8; YOR50-14; O5014; O5070; YOR224C Shared subunit of RNA polymerases I, II, and III (ABC14.5)                         |
| YOR359W; O6638 Protein of unknown function                                                                               |
| YPL170W; P2515 Protein with similarity to steroid membrane receptors                                                     |
| PUS1; P1805; YPL212C Pseudouridine synthase responsible for specific pseudouridine modifications in tRNA and in U2 snRNA |
| NEW1; P1445; YPL226W Member of the non-transporter group of the ATP-binding cassette (ABC) superfamily                   |
| YPL238C; P1051 Protein of unknown function                                                                               |
| ARO7; OSM2; HGS1; YP9499.15; YPR060C Chorismate mutase, required for the synthesis of both phenylalanine and tyrosine    |
| YPR143W; P9659.4 Protein of unknown function                                                                             |
| RPC82; RPC3; P9677.11; YPR190C RNA polymerase III, third-largest subunit                                                 |
| RPC10; RPB12; YHR143W-A Shared subunit of RNA polymerases I, II, and III (ABC10alpha), has zinc-binding domain           |

Supplementary Table S6:

Homologous genes which are induced in Sporulation or Return to Growth

Homologous genes (that were found using systematic blast that was done in our laboratory) were checked for their expression during sporulation and Return to Growth (RTG). The genes were classified according to their induction (during sporulation or RTG). The function of the genes is shown on the left. Genes marked with asterisk are induced both during sporulation and RTG.

| <b>Function</b>                                                | <b>Sporulation</b>             | <b>RTG</b>               |
|----------------------------------------------------------------|--------------------------------|--------------------------|
| Amino acid transport                                           | <i>ALP1</i>                    | <i>TAT2</i>              |
| Cell wall                                                      | <i>CRR1</i>                    | <i>UTR2</i>              |
| Cell wall organization and biogenesis (Exo-beta-1,3-glucanase) | <i>EXG2</i>                    | <i>EXG1</i>              |
| Cell wall/spore wall                                           | <i>SPS100</i>                  | <i>ASP3-2</i>            |
| Chromatin silencing                                            | <i>ORC1</i>                    | <i>SIR3</i>              |
| Chromosome condensation                                        | <i>SMC3</i>                    | <i>SMC4</i>              |
| DNA repair                                                     | <i>MSH4,5,6</i>                | <i>MSH1</i>              |
| recombination                                                  | <i>MEK1</i>                    | <i>DUN1*</i>             |
| Exo-beta-1,3-glucanase                                         | <i>FKS3</i>                    | <i>FKS1</i>              |
| Intracellular transport                                        | <i>VPS21</i>                   | <i>GSP1</i>              |
| Kinase                                                         | <i>MEK1, SMK1, RIM11, MRK1</i> | <i>CKA2</i>              |
| Meiosis                                                        | <i>ZIP1</i>                    | <i>BFR1*</i>             |
| Nucleocytoplasmic transport                                    | <i>CSE1</i>                    | <i>SXM1, NMD5</i>        |
| Phosphatase                                                    | <i>DIA3</i>                    | <i>PHO3</i>              |
| Phospholipid transport                                         | <i>PDR17</i>                   | <i>PDR16</i>             |
| protein amino acid glycosylation                               | <i>SRT1</i>                    | <i>RER2</i>              |
| septin                                                         | <i>SPR3, CDC3, CDC10</i>       | <i>CDC12*</i>            |
| snRNA-nucleus export                                           | <i>NUP116</i>                  | <i>NUP100, NSP1</i>      |
| Transcription factor                                           | <i>USV1</i>                    | <i>MIG3</i>              |
| Transport, mitochondrial                                       | <i>ODC1, PET8</i>              | <i>GGC1, OAC1, ARG11</i> |

Supplementary Table S7: Middle Sporulation genes that are repressed upon transfer to YPD

The average pattern ( $\log_2$ ratio) is plotted upon transfer to YPD (which was followed for 5, 20 and 40 minutes after the transfer). The genes in the group, along with a one line description, are indicated.

Template genes used to create this group are: *CDC20*, *YDL114W* and *YNL319W*.

| Group                                                                                                                                                                                   | 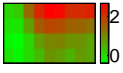 |
|-----------------------------------------------------------------------------------------------------------------------------------------------------------------------------------------|-----------------------------------------------------------------------------------|
| YAL018C; YAL003 Protein of unknown function, has 5 potential transmembrane segments                                                                                                     |                                                                                   |
| PAU7; YARS03C; YAR020C Member of the seripauperin (PAU) family, has strong similarity to Pau3p/Ycr104p                                                                                  |                                                                                   |
| CDC27; SNB1; YBL0718; YBL084C Component of anaphase-promoting complex (APC), required for the metaphase-anaphase transition and for Clb2p degradation                                   |                                                                                   |
| GAL7; YBR0226; YBR018C UDP-glucose--hexose-1-phosphate uridylyltransferase                                                                                                              |                                                                                   |
| TCM62; YBR0414; YBR044C Chaperone-like protein required for the assembly of the mitochondrial succinate dehydrogenase complex                                                           |                                                                                   |
| GIP1; YBR0420; YBR045C Glc7p-interacting protein, possible regulatory subunit for the PP1 family protein phosphatases                                                                   |                                                                                   |
| YBR063C; YBR0610 Protein with similarity to phosphopantethein-binding proteins                                                                                                          |                                                                                   |
| YBR064W; YBR0612 Protein of unknown function                                                                                                                                            |                                                                                   |
| YBR071W; YBR0712 Protein with weak similarity to Herpesvirus saimiri EERF2                                                                                                              |                                                                                   |
| IML3; MCM19; YBR0836; YBR107C Protein required for minichromosome maintenance                                                                                                           |                                                                                   |
| UBS1; YBR1217; YBR165W Positive regulator of Cdc34p                                                                                                                                     |                                                                                   |
| YBR168W; YBR1220 Essential protein of unknown function                                                                                                                                  |                                                                                   |
| DTR1; YBR1242; YBR180W Dityrosine transporter, member of the multidrug-resistance 12-spanner (DHA12) family of the major facilitator superfamily (MFS-MDR)                              |                                                                                   |
| FTH1; YBR1448; YBR207W Vacuolar iron transporter with similarity to Ftr1p                                                                                                               |                                                                                   |
| YBR250W; YBR1702 Protein of unknown function                                                                                                                                            |                                                                                   |
| YPT10; YBR1733; YBR264C Protein member of the rab family in the ras superfamily of small GTP-binding proteins                                                                           |                                                                                   |
| MRPL37; YML37; YBR1736A; YBR268W Mitochondrial ribosomal protein of the large subunit                                                                                                   |                                                                                   |
| YCL010C Protein of unknown function                                                                                                                                                     |                                                                                   |
| YCL048W Protein with similarity to Ecm33p and Sps2p                                                                                                                                     |                                                                                   |
| CDC10; YCR022; YCR002C Septin, component of 10 nm filaments of mother-bud neck, involved in cytokinesis                                                                                 |                                                                                   |
| YCR025C; YCR244 Protein of unknown function                                                                                                                                             |                                                                                   |
| YCR033W; YCR592 Protein of unknown function                                                                                                                                             |                                                                                   |
| YCR045C Protein with similarity to protease B (Prb1p) and subtilisin family proteases                                                                                                   |                                                                                   |
| YCR086W; SPO86 Protein possibly involved in sporulation                                                                                                                                 |                                                                                   |
| APC11; D2900; YDL008W Component of the anaphase-promoting complex (APC), has ubiquitin ligase activity and is required for the metaphase-anaphase transition                            |                                                                                   |
| MPS1; RPK1; PAC8; D2785; YDL028C Serine/threonine/tyrosine protein kinase involved in spindle pole body duplication and in mitotic checkpoint                                           |                                                                                   |
| QRI1; UAP1; D2362; YDL103C UDP-N-acetylglucosamine pyrophosphorylase                                                                                                                    |                                                                                   |
| YDL114W; D2297 Protein with similarity to proteins of the short-chain alcohol dehydrogenase family                                                                                      |                                                                                   |
| CLB3; D1539; YDL155W G2/M-phase-specific cyclin                                                                                                                                         |                                                                                   |
| YDL186W; D1281 Protein of unknown function                                                                                                                                              |                                                                                   |
| YDL239C; D0771 Putative coiled-coil protein, has similarity to <i>S. cerevisiae</i> Cnm67p, a spindle pole body and nuclear migration protein                                           |                                                                                   |
| YDL247W; MPH2; D0220 Protein with similarity to maltose permeases including Yjr160p, Mal31p, Mal61p, member of the hexose transporter family of the major facilitator superfamily (MFS) |                                                                                   |
| YDR010C; PZA109; PZE110; D3209; YD8119.15 Protein of unknown function                                                                                                                   |                                                                                   |
| GIS1; YD8557.03; YDR096W DNA damage-responsive repressor of PHR1, has two tandem                                                                                                        |                                                                                   |

|                                                                                                                                                                                                      |
|------------------------------------------------------------------------------------------------------------------------------------------------------------------------------------------------------|
| C2H2-type zinc finger domains                                                                                                                                                                        |
| STE5; NUL3; YD8557.12; YDR103W Pheromone pathway scaffolding protein involved in a complex with Fus3p, Ste7p, and Ste11p                                                                             |
| SPO71; YD8557.13; YDR104C Protein involved in spore wall formation                                                                                                                                   |
| APC4; YD9727.13; YDR118W Component of the anaphase-promoting complex (APC), required for Clb2p degradation and for the metaphase-anaphase transition                                                 |
| EKI1; YD8358.04; YDR147W Ethanolamine kinase I has similarity to Cki1p choline kinase                                                                                                                |
| UBC1; YD9395.10; YDR177W Ubiquitin conjugating enzyme (E2) that plays a role early in spore germination                                                                                              |
| YDR179C; YD9395.12 Protein of unknown function                                                                                                                                                       |
| PLP1; YD9395.17; YDR183W Phosphatidylinositol 3-OH kinase homologue likely to be involved in regulation of pheromone response                                                                        |
| YDR196C; YD9346.07 Protein of unknown function                                                                                                                                                       |
| SPR28; YD9934.03; YDR218C Septin-related protein expressed during sporulation                                                                                                                        |
| EXG2; YD9320A.12; YDR261C Exo-beta-1,3-glucanase (beta-1,3-D-glucanoglucanohydrolase), minor isoform                                                                                                 |
| DIN7; DIN3; YD9320B.02; YDR263C Mitochondrial inner membrane nuclease with a role in stabilizing the mitochondrial genome expression induced by DNA damage                                           |
| CCC2; D9954.6; YDR270W Copper-transporting P-type ATPase, member of the cation transport (E1-E2) ATPase family                                                                                       |
| YDR273W; DON1; D9954.4 Component of the prospore membrane                                                                                                                                            |
| TFB1; D9740.3; YDR311W Component of RNA polymerase II transcription initiation factor TFIIF (factor b), 75 kDa subunit                                                                               |
| YDR317W; D9798.8 Protein of unknown function                                                                                                                                                         |
| YDR371W; D9481.7 Protein with similarity to chitinases                                                                                                                                               |
| DIT2; CYP56; D9509.20; YDR402C Cytochrome P450 56, second enzyme in the pathway for biosynthesis of dityrosine in the outer layer of the spore wall                                                  |
| PDR15; D9509.24; YDR406W Member of ATP-binding cassette (ABC) superfamily                                                                                                                            |
| TRS120; D9509.25; YDR407C Protein of the TRAPP (TRANsport Protein Particle) complex involved in vesicular transport from endoplasmic reticulum to Golgi                                              |
| YDR438W; (D9461.24) Protein of unknown function                                                                                                                                                      |
| DIG2; (RST2); D8035.23; YDR480W MAP kinase-associated protein involved in negative regulation of invasive growth and mating response                                                                 |
| PAC11; D8035.31; YDR488C Dynein intermediate chain, required in the absence of Cin8p, member of the WD (WD-40) repeat family                                                                         |
| LCD1; DDC2; CIP1; PIE1; D9719.5; YDR499W Essential protein required for DNA damage checkpoint pathway in G1 and G2/M phases of cell cycle                                                            |
| YDR504C; D9719.10 Protein of unknown function                                                                                                                                                        |
| PAD1; POF1; D9719.39B; YDR538W Phenylacrylic acid decarboxylase                                                                                                                                      |
| YDR539W; D3703.2 Protein of unknown function                                                                                                                                                         |
| YEL016C Protein with similarity to Ycr026p                                                                                                                                                           |
| YEL017W Protein of unknown function                                                                                                                                                                  |
| YEL023C Protein of unknown function                                                                                                                                                                  |
| PCM1; AGM1; YEL058W Hexosephosphate mutase (phosphoacetylglucosamine mutase, N-acetylglucosamine-phosphate mutase) converts N-acetyl-D-glucosamine 1-phosphate to N-acetyl-D-glucosamine 6-phosphate |
| CIN8; KSL2; SLN2; SDS15; CST16; YEL061C Kinesin-related protein involved in establishment and maintenance of mitotic spindle                                                                         |
| SPC25; YER018C Component of the Tid3p-Nuf2p-Spc24p-Spc25p centromere complex, involved in chromosome segregation                                                                                     |
| YER046W Protein of unknown function                                                                                                                                                                  |
| YER084W Protein of unknown function                                                                                                                                                                  |
| YER085C Protein of unknown function                                                                                                                                                                  |
| UBC6; DOA2; YER100W Ubiquitin-conjugating enzyme anchored in the ER membrane with the catalytically active domain in cytoplasm                                                                       |
| MAM1; YER106W Monopolin, protein involved in chromosome attachment to the meiotic spindle, induced in sporulation                                                                                    |
| ISC10; SYGP-ORF62; YER180C Meiosis-specific protein required for spore formation                                                                                                                     |

|                                                                                                                                                                                                                         |
|-------------------------------------------------------------------------------------------------------------------------------------------------------------------------------------------------------------------------|
| YER182W Protein of unknown function                                                                                                                                                                                     |
| HXT10; YFL011W Hexose transporter, member of the hexose transporter family of the major facilitator superfamily (MFS)                                                                                                   |
| GNA1; (PAT1); YFL017C Phosphoglucosamine acetyltransferase                                                                                                                                                              |
| YFL040W Putative hexose transporter, member of the hexose transport family of the major facilitator superfamily (MFS)                                                                                                   |
| FET5; YFL041W Multicopper oxidase involved in ferrous iron transport                                                                                                                                                    |
| YFR012W Protein of unknown function                                                                                                                                                                                     |
| PES4; YFR023W Suppressor of DNA polymerase epsilon mutation, contains four RNA recognition motif (RRM) domains                                                                                                          |
| CDC14; OAF3; YFR028C Dual specificity protein phosphatase (PTPase) that performs a function late in the cell cycle                                                                                                      |
| CDC26; HIT3; SCD26; YFR036W Component of the anaphase-promoting complex (APC), required for Clb2p degradation and for the metaphase-anaphase transition                                                                 |
| CDH1; HCT1; G3765; YGL003C Protein involved in Clb2p cyclin proteolysis, has WD (WD-40) repeats                                                                                                                         |
| YGL015C; YGL026; G3716 Protein of unknown function                                                                                                                                                                      |
| CDC20; PAC5; G2939; YGL116W Activator of anaphase promoting complex (APC), required for microtubule function at mitosis and for exit from anaphase, contains WD (WD-40) repeats                                         |
| NAB2; G2910; YGL122C Nuclear poly(A)-binding protein, required for proper polyadenylation of pre-mRNA and for mRNA export                                                                                               |
| SUT1; G1828; YGL162W Protein involved in sterol uptake                                                                                                                                                                  |
| YGL170C; G1654 Protein with similarity to phosphoribulokinase precursor                                                                                                                                                 |
| YGL176C; G1636 Protein with weak similarity to Discopyge ommata Ca <sup>2+</sup> channel alpha1 subunit protein B47447                                                                                                  |
| PDE1; NRB369; G0574; YGL248W 3',5'-Cyclic-nucleotide phosphodiesterase, low affinity                                                                                                                                    |
| SPR3; G4353; YGR059W Sporulation-specific septin                                                                                                                                                                        |
| CLB1; SCB1; G5967; YGR108W G2/M-phase-specific cyclin                                                                                                                                                                   |
| CLB6; G5970; YGR109C B-type cyclin appearing late in G1, involved in initiation of DNA synthesis                                                                                                                        |
| TOS10; G6661; YGR153W Protein of unknown function                                                                                                                                                                       |
| FYV8; G7589; YGR196C Protein of unknown function                                                                                                                                                                        |
| YGR201C; G7727 Protein with similarity to translation elongation factors                                                                                                                                                |
| AMA1; ORF409; SPO70; G8541; YGR225W Protein required for proper meiosis and sporulation, associates with and regulates the activity of anaphase promoting complex/cyclosome (APC/C), member of Cdc20 family of proteins |
| YGR273C; G9371 Protein of unknown function                                                                                                                                                                              |
| RNH70; G9381; YGR276C Ribonuclease H (70 kDa), endonuclease that degrades RNA in RNA-DNA hybrids                                                                                                                        |
| YHL012W Protein with similarity to UTP glucose-1-phosphate uridylyltransferase                                                                                                                                          |
| WSC4; YHC8; YFW1; YHL028W Protein required for secretory protein translocation, for maintenance of cell wall integrity, and for the stress response                                                                     |
| MIP6; YHR015W Protein with similarity to Pes4p and Pab1p in the N-terminal region, has 4 RNA recognition (RRM) domains                                                                                                  |
| EPT1; YHR123W sn-1,2-Diacylglycerol ethanolamine phosphotransferase, catalyzes the synthesis of phosphatidylethanolamine from CDP-ethanolamine and diacylglycerol                                                       |
| NDT80; YHR124W Meiosis-specific protein required for exit from pachytene                                                                                                                                                |
| WSS1; YHR134W Protein of unknown function                                                                                                                                                                               |
| YHR150W Protein of unknown function                                                                                                                                                                                     |
| YHR151C Protein of unknown function                                                                                                                                                                                     |
| CDC23; H9986.19; YHR166C Component of anaphase-promoting complex (APC) required for Clb2p degradation and for the metaphase-anaphase transition                                                                         |
| SSP1; YHR184W Meiosis-specific protein, required for proper completion of meiotic division and spore formation                                                                                                          |
| ADY1; YHR185C Protein required for sporulation                                                                                                                                                                          |
| PIG2; YI9905.03; YIL045W Protein that interacts with Gsy2p, possible regulatory subunit for the PP1-family protein phosphatase Glc7p                                                                                    |
| FIS1; MDV2; YIL065C Protein involved in mitochondrial division                                                                                                                                                          |

|                                                                                                                                                                                                                |
|----------------------------------------------------------------------------------------------------------------------------------------------------------------------------------------------------------------|
| YIL112W Protein with similarity to ankyrin and coiled-coil proteins                                                                                                                                            |
| ECM37; YIL146C Protein possibly involved in cell wall structure or biosynthesis                                                                                                                                |
| DNA43; MCM10; YIL150C Protein required for S-phase initiation or completion                                                                                                                                    |
| YIL154C; (IMP2); BLM25; HCY39 Protein involved in control of mitochondrial sugar utilization and repair of oxidative DNA lesions                                                                               |
| BNR1; YIL159W Bni1p-related protein, potential target of Rho4p                                                                                                                                                 |
| SDL1; (SED1); (SDH1); YI9402.08A; YI9402.08B; YIL167W; YIL168W Serine dehydratase, converts serine to pyruvate and ammonia for gluconeogenesis                                                                 |
| MAD3; J1341; YJL013C Spindle-assembly checkpoint protein required for cell cycle delay in response to impaired kinetochore function                                                                            |
| YJL038C; J1232 Protein of unknown function                                                                                                                                                                     |
| YJL043W; J1204 Protein of unknown function                                                                                                                                                                     |
| CHS6; CSD3; J0838; YJL099W Protein involved in chitin synthase Chs3p activity has tetratricopeptide (TPR) repeats, mutants are resistant to calcofluor white                                                   |
| YJL131C; J0682 Protein with similarity to carbamylphosphate synthetase                                                                                                                                         |
| IDS2; J0642; YJL146W Protein that affects the function of Ime2p                                                                                                                                                |
| YJL160C; J0555 Protein with similarity to members of the Pir1p/Hsp150p/Pir3p family                                                                                                                            |
| YJL162C; J0549 Protein with similarity to E. coli DnaJ and other DnaJ-like proteins                                                                                                                            |
| PET191; GTA108; J1604; YJR034W Protein involved in assembly of cytochrome oxidase                                                                                                                              |
| HUL4; HCT4; GTD892; J1608; YJR036C Putative ubiquitin-protein ligase                                                                                                                                           |
| YJR037W; GTC127; J1610 Protein of unknown function                                                                                                                                                             |
| STE18; J1866; YJR086W Gamma subunit of the guanine nucleotide-binding protein that mediates signal transduction by pheromones during mating                                                                    |
| YUH1; J1941; YJR099W Ubiquitin-specific protease                                                                                                                                                               |
| YJR107W; J1983 Protein of unknown function, has similarity to acylglycerol lipase                                                                                                                              |
| YJR141W; J2166 Essential protein of unknown function                                                                                                                                                           |
| YJR160C; MPH3; J2400 Protein with strong similarity to maltose permeases (maltose/H <sup>+</sup> symporters) Mal31p and Mal61p, member of hexose transporter family of the major facilitator superfamily (MFS) |
| CDC16; YKL022C Component of anaphase-promoting complex (APC), required for Clb2p degradation and for the metaphase-anaphase transition                                                                         |
| YKL100C; YKL450 Protein of unknown function                                                                                                                                                                    |
| YKL133C Protein of unknown function                                                                                                                                                                            |
| APE2; LAP1; YKL611; YKL157W Aminopeptidase II (ypscII), plays a nutritional role in releasing leucine from peptides externally cleaved at leucine                                                              |
| HYM1; YKL189W Protein required for sporulation with similarity to Aspergillus nidulans hymA which is involved in conidiophore development                                                                      |
| YKL221W; B473 Protein with similarity to mammalian monocarboxylate transporters MCT1 and MCT2, member of the monocarboxylate transporter (MCP) family of the major facilitator superfamily (MFS)               |
| ECM9; YK103; YKR004C Protein possibly involved in cell wall structure or biosynthesis                                                                                                                          |
| YKR015C Protein of unknown function                                                                                                                                                                            |
| YKR100C Protein of unknown function                                                                                                                                                                            |
| ORC3; L1365; (OAF1); YLL004W Origin recognition complex (ORC), 62 kDa subunit                                                                                                                                  |
| SPA2; PEA1; PPF1; L1209; YLL021W Protein involved in cell polarity and cell fusion during mating                                                                                                               |
| YLL047W; L0709 Protein of unknown function                                                                                                                                                                     |
| YLR030W; L1759 Protein of unknown function                                                                                                                                                                     |
| STU2; L2108; YLR045C Component of the spindle pole body                                                                                                                                                        |
| YLR054C; L2141 Protein of unknown function                                                                                                                                                                     |
| YLR072W; L2321 Protein of unknown function                                                                                                                                                                     |
| RAX2; L9449.12; YLR084C; L2389 Protein involved in bipolar budding                                                                                                                                             |
| NYV1; L8004.4; L2531; YLR093C Synaptobrevin (v-SNARE) homolog involved in vacuolar vesicle fusion                                                                                                              |
| IOC2; L8004.6; YLR095C; L2542 Protein of unknown function                                                                                                                                                      |
| APC9; L8004.10; L2710; YLR102C Component of the anaphase-promoting complex (APC) required for Clb2p degradation and for the metaphase-anaphase transition                                                      |



|                                                                                                                                                                                                                             |
|-----------------------------------------------------------------------------------------------------------------------------------------------------------------------------------------------------------------------------|
| YLR126C; L9233.12; L3105 Protein with weak similarity to Pseudomonas aeruginosa anthranilate synthase component II                                                                                                          |
| APC2; RSI1; TID2; L9233.13; L3108; YLR127C Component of the anaphase-promoting complex, required for Clb2p degradation and for the metaphase-anaphase transition                                                            |
| PNP1; L8167.19; YLR209C Protein with similarity to human purine nucleoside phosphorylase                                                                                                                                    |
| CLB4; L8167.3; YLR210W G2/M-phase-specific cyclin                                                                                                                                                                           |
| CRR1; L8167.22; YLR213C Sporulation specific protein with similarity to Crh1p cell wall protein                                                                                                                             |
| CCC1; L8083.6; YLR220W Protein with potential role in calcium regulation, overproduction suppresses the calcium-sensitive phenotype of csg1 strains                                                                         |
| CDA1; L2142.2; YLR307W Chitin deacetylase, responsible along with Cda2p for the synthesis of chitosan for the ascospore wall                                                                                                |
| EST2; L8543.12; YLR318W Catalytic component of telomerase, predicted reverse transcriptase                                                                                                                                  |
| YLR341W; L8300.7 Protein of unknown function                                                                                                                                                                                |
| YLR343W; L8300.5; GAS2 Protein with strong similarity to Gas1p, member of the GPI-anchored beta(1-3)glucanosyltransferases family                                                                                           |
| ROM2; L8039.3; YLR371W GDP-GTP exchange factor for Rho1p that is activated by cell wall defects                                                                                                                             |
| CSR1; SFH2; L3502.4; YLR380W Phosphatidylinositol transfer protein, involved in regulation of phospholipase D (Spo14p) activity                                                                                             |
| SRC1; YML033W; YML034W Protein of unknown function, expression is cell cycle-regulated                                                                                                                                      |
| MFT1; MFT52; YML062C Targeting factor for mitochondrial precursor proteins, member of a family of transmembrane transition metal transporters                                                                               |
| YML066C Protein of unknown function                                                                                                                                                                                         |
| YML119W; YM7056.07 Protein of unknown function                                                                                                                                                                              |
| CDC5; PKX2; MSD2; YM8270.03; YMR001C Serine/threonine protein kinase required for exit from mitosis may be involved in operation of the mitotic spindle, member of the polo family of protein kinases                       |
| SPO20; YM9711.05; YMR017W; DBI9 Protein required for sporulation and growth of prospore membrane, interacts with Dbf2p                                                                                                      |
| NUP116; NSP116; YM9532.12; YMR047C Nuclear pore protein (nucleoporin) of the GLFG family may be involved in binding and translocation of nuclear proteins                                                                   |
| STV1; YM9796.07; YMR054W Subunit of V0 sector of V-ATPase proton pump of non-vacuolar organelles                                                                                                                            |
| ABF2; CDRP1; HIM1; HM p19-HM mtTFA YM9916.11; YMR072W Abundant mitochondrial DNA-binding protein required for maintenance, transmission and recombination of mitochondrial genome, contains two HMG-box DNA-binding domains |
| STO1; GCR3; CBC1; CBP80; YM9553.01; YM9564.07; YMR125W Large subunit of the nuclear cap-binding protein complex                                                                                                             |
| HOT1; YM8010.02; YMR172W Protein required with Msn1p for hyperosmotic stress-induced gene expression                                                                                                                        |
| YMR184W; YM8010.14 Protein of unknown function                                                                                                                                                                              |
| YMR188C; YM8010.18 Probable mitochondrial ribosomal protein, has weak similarity to prokaryotic 30S ribosomal protein S17                                                                                                   |
| YMR253C; YM9920.07 Protein of unknown function, likely membrane protein                                                                                                                                                     |
| YNL013C; N2854 Protein of unknown function, questionable ORF                                                                                                                                                                |
| YNL018C; N2831 Protein of unknown function, nearly identical to Ynl034p                                                                                                                                                     |
| YNL019C; N2827 Protein of unknown function                                                                                                                                                                                  |
| YNL026W; N2802 Protein of unknown function                                                                                                                                                                                  |
| YNL033W; N2743 Protein of unknown function                                                                                                                                                                                  |
| YNL034W; N2740 Protein of unknown function, nearly identical to Ynl018p                                                                                                                                                     |
| YNL080C; N2327 Protein of unknown function                                                                                                                                                                                  |
| YNL095C; N2215 Protein with similarity to Ecm3p                                                                                                                                                                             |
| MET4; N2177; YNL103W Transcriptional activator of the sulfur assimilation pathway member of basic leucine zipper (bZIP) family                                                                                              |
| SPC98; N122; N1879; YNL126W Spindle pole body component that interacts with gamma-tubulin                                                                                                                                   |

|                                                                                                                                                                                             |
|---------------------------------------------------------------------------------------------------------------------------------------------------------------------------------------------|
| YNL170W; N1688 Protein of unknown function, questionable ORF                                                                                                                                |
| YNL171C; N1684 Protein of unknown function, questionable ORF                                                                                                                                |
| YNL205C; N1350 Protein of unknown function                                                                                                                                                  |
| ALG9; N1295; YNL219C Mannosyltransferase involved in N-glycosylation, catalyzes transfer of mannose from Dol-P-Man to lipid-linked oligosaccharides                                         |
| AUT2; APG4; N1274; YNL223W Cysteine endopeptidase involved in autophagy, required for attachment of autophagosomes to microtubules, also required for sporulation in combination with Aut7p |
| CNM67; CNM1; N1264; YNL225C Protein involved in nuclear migration and component of the spindle pole body                                                                                    |
| ALP1; (APL1); N0660; YNL270C Arginine permease with strong similarity to basic amino acid permeases Can1p and Lyp1p                                                                         |
| HXT14; N0345; N0344; YNL318C Member of the hexose transporter family of the major facilitator superfamily [MFS]                                                                             |
| YNL319W; N0343 Protein of unknown function, questionable ORF                                                                                                                                |
| AUT1; N2040; YNR007C Protein involved in autophagocytosis during starvation                                                                                                                 |
| YNR068C; N3551 Protein with similarity to Bul1p ubiquitin ligase binding protein, may be a pseudogene or separated from YNR069C by sequencing errors                                        |
| YOL015W; O2329 Protein of unknown function, induced during anaerobic growth                                                                                                                 |
| YOL024W; O2181 Protein of unknown function                                                                                                                                                  |
| SPO21; MPC70; O0932; YOL091W Component of the meiotic plaque, required for formation of the prospore membrane                                                                               |
| MED7; AOE222; O0505; YOL135C Component of RNA polymerase II holoenzyme and mediator subcomplex                                                                                              |
| YOL146W; AOA236; O0456 Protein of unknown function                                                                                                                                          |
| EXO1; DHS1; O2727; OR26.23; YOR033C Double-stranded DNA 5'→3' exonuclease, involved in mismatch repair and recombination                                                                    |
| YOR073W; YOR29-24; O2945 Protein of unknown function                                                                                                                                        |
| PTC5; O3157; YOR3157; YOR090C Putative serine/threonine protein phosphatase of the PP2C family                                                                                              |
| ARF3; ARL2; YOR3172; O3172; YOR094W Protein with similarity to members of the arf family (ras superfamily) of GTP-binding proteins                                                          |
| IAH1; (EST2); O3287; YOR126C Isoamyl acetate-hydrolyzing esterase enzyme                                                                                                                    |
| YOR152C; O3536 Protein of unknown function                                                                                                                                                  |
| DCI1; ECI2; EHD2; EDH2; O4718; YOR180C Peroxisomal dienoyl-CoA isomerase                                                                                                                    |
| MSB1; O4744; YOR188W Protein that may play a role in polarity establishment and bud formation                                                                                               |
| STE4; HMD2; YOR50-2; O5002; YOR212W Beta subunit of the trimeric G protein that mediates signal transduction by pheromones, member of the WD (WD-40) repeat family                          |
| YOR218C; YOR50-8; O5008; O5042 Protein of unknown function                                                                                                                                  |
| HES1; OSH5; O5234; YOR237W Protein implicated in ergosterol biosynthesis, member of the KES1/HES1/OSH1/YKR003W family of oxysterol-binding (OSBP) proteins                                  |
| APC5; O5280; YOR249C Component of the anaphase-promoting complex (APC), required for Clb2p degradation and for the metaphase-anaphase transition                                            |
| YOR251C; O5305 Rhodanese (thiosulfate sulfurtransferase), functions to detoxify cyanide                                                                                                     |
| YOR255W; O5325 Protein of unknown function                                                                                                                                                  |
| HEM4; SLU2; CYT TS2326; O5463W; YOR278W Uroporphyrinogen III synthase, fourth step in heme biosynthesis pathway                                                                             |
| YOR282W; O5477 Protein of unknown function                                                                                                                                                  |
| TIM18; O5627; YOR297C Component of the inner mitochondrial membrane translocation complex                                                                                                   |
| RAX1; O5642; YOR301W Protein involved in determination of budding pattern                                                                                                                   |
| YOR305W; O5653 Protein of unknown function                                                                                                                                                  |
| UBC11; O6268; YOR339C Protein with similarity to ubiquitin-conjugating enzymes                                                                                                              |
| YOR345C; O6336 Protein of unknown function                                                                                                                                                  |
| CIN1; O6350; YOR349W Protein involved in chromosome segregation, required for microtubule stability                                                                                         |
| YOR352W; O6608 Protein of unknown function                                                                                                                                                  |

|                                                                                                                                                                               |
|-------------------------------------------------------------------------------------------------------------------------------------------------------------------------------|
| YOR365C; O6661 Protein of unknown function                                                                                                                                    |
| ATF1; O6741; YOR377W Alcohol acetyltransferase, catalyzes condensation of acetyl-CoA to various alcohols to produce acetate esters                                            |
| FRE3; O6754; YOR381W Protein involved in the uptake of iron from siderophores rhodotorulic acid, triacetylfusarinine C, ferrichrome and ferrioximine B                        |
| SRD2; ECM23; LPB10; YPL021W Protein with similarity to Srd1p                                                                                                                  |
| YPL027W; LPB4 Protein of unknown function                                                                                                                                     |
| YPL047W; P7102.04 Protein of unknown function                                                                                                                                 |
| ARL3; (ARP1); LPE21; YPL051W ADP-ribosylation factor-like protein, member of the arf-sar family in the ras superfamily                                                        |
| BEM3; LPH12; YPL115C GTPase-activating protein (GAP) for Cdc42p and Rho1p, contains a PH (pleckstrin) domain                                                                  |
| CBC2; CBP20; MUD13; SAE1; P2259; YPL178W Small subunit of nuclear cap-binding protein complex                                                                                 |
| DDC1; P1920; YPL194W DNA damage checkpoint protein, delays the cell cycle at the G1/S boundary in response to UV irradiation, member of the RAD24 epistasis group             |
| YPL267W; P0360 Protein of unknown function                                                                                                                                    |
| YPR027C; YP9367.07 Protein with similarity to Ynl019p and Ynl033p                                                                                                             |
| SMK1; YP9499.10; YPR054W Sporulation-specific protein kinase of the MAP family required for completion of sporulation                                                         |
| YPR078C; P9513.10 Protein of unknown function                                                                                                                                 |
| YPR079W; P9513.8 Protein of unknown function                                                                                                                                  |
| CLB5; P9642.8; YPR120C B-type cyclin appearing late in G1, involved in initiation of DNA synthesis                                                                            |
| KAR3; OSR11; P9659.16; YPR141C Kinesin-like protein involved in mitosis and essential for the congression (nuclear migration) step of karyogamy, probable coiled-coil protein |

Supplementary Table S8: Middle sporulation genes that are insulated

The genes in the insulated group. The average pattern ( $\log_2$ ratio) is plotted upon transfer to YPD (which was followed for 5, 20 and 40 minutes after the transfer). The genes in the group, along with a one line description, are indicated.

Template genes used to create this group are: *SGA1*, *SPR6*, *YDR042C* and *YPL130W*.

| Insulated genes                                                                                                                                                                                       | 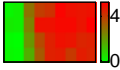 |
|-------------------------------------------------------------------------------------------------------------------------------------------------------------------------------------------------------|-----------------------------------------------------------------------------------|
| YCL048W Protein with similarity to Ecm33p and Sps2p                                                                                                                                                   |                                                                                   |
| YDR042C; YD6888.04; D4155 Protein of unknown function                                                                                                                                                 |                                                                                   |
| YDR371W; D9481.7 Protein with similarity to chitinases                                                                                                                                                |                                                                                   |
| YDR516C; D9719.21 Protein with similarity to Glk1p                                                                                                                                                    |                                                                                   |
| SPS2; D9719.26; YDR522C Protein involved in middle/late stage of sporulation                                                                                                                          |                                                                                   |
| SPS1; D9719.27; YDR523C Serine/threonine protein kinase involved in middle/late stage of meiosis                                                                                                      |                                                                                   |
| SPR6; YER115C Sporulation-specific protein                                                                                                                                                            |                                                                                   |
| HXT10; YFL011W Hexose transporter, member of the hexose transporter family of the major facilitator superfamily (MFS)                                                                                 |                                                                                   |
| YFR032C Protein with weak similarity to <i>S. pombe</i> poly(A)-binding protein (SP:P31209), has one RNA recognition (RRM) domain                                                                     |                                                                                   |
| YGL230C; G0946 Protein of unknown function                                                                                                                                                            |                                                                                   |
| SGA1; SGA SAG YIL099W Glucoamylase (glucan-alpha-1,4-glucosidase), sporulation-specific                                                                                                               |                                                                                   |
| GAT4; YIR013C Putative GATA zinc finger transcription factor                                                                                                                                          |                                                                                   |
| YJL037W; J1234 Protein of unknown function                                                                                                                                                            |                                                                                   |
| YLR049C; L2121 Protein of unknown function                                                                                                                                                            |                                                                                   |
| YNL155W; N1751 Protein of unknown function                                                                                                                                                            |                                                                                   |
| SOL1; N3291; YNR034W Possible 6-phosphogluconolactonase involved in tRNA synthesis and function                                                                                                       |                                                                                   |
| YOL132W; AOA471; O0514; GAS4 Protein with similarity to glycopospholipid-anchored surface glycoprotein GAS1                                                                                           |                                                                                   |
| VPS21; VPT21; YPT51; YOR3154; O3154; YOR089C GTP-binding protein required for sorting of vacuolar proteins and involved in late stage of endocytosis, member of the rab family in the ras superfamily |                                                                                   |
| SPR1; SSG1; SSG O4750; YOR190W Sporulation-specific exo-beta-1,3-glucanase, involved in late sporulation                                                                                              |                                                                                   |
| YOR214C; YOR50-4; O5004 Protein of unknown function                                                                                                                                                   |                                                                                   |
| SSP2; O5251; YOR242C Sporulation-specific protein                                                                                                                                                     |                                                                                   |
| SPS4; O6120; YOR313C Protein expressed in mid-late (8-14 hr) sporulation, possible cell wall component                                                                                                |                                                                                   |
| SPO19; LPI15; YPL130W Sporulation specific protein, putative glycoposphatidylinositol (GPI)-anchored spore wall protein                                                                               |                                                                                   |
| YPR077C; P9513.9B Protein of unknown function                                                                                                                                                         |                                                                                   |

Supplementary Table S9: List of 936 genes used for Figure 6a

|         |         |         |         |         |
|---------|---------|---------|---------|---------|
| YJL162C | PDS5    | YER146W | YKL172W | YMR123W |
| YCL002C | YPR194C | YOR318C | YOR004W | YBL054W |
| CLB4    | CLB2    | AST1    | YLR022C | DIS3    |
| RTG1    | PGD1    | YPL038W | YNL110C | TRP3    |
| CLB6    | DBF4    | YDR472W | YLR409C | YNL174W |
| KAR3    | RRP43   | ALG5    | RPB8    | YML093W |
| ORC3    | YHR154W | SEN34   | YOL010W | DIP2    |
| SPO16   | YGR198W | RAD27   | YKL120W | URK1    |
| YDR147W | RRN6    | YAP7    | HGH1    | POP3    |
| BBP1    | YOL031C | YHR052W | YDL060W | YLR073C |
| CIN8    | YBR266C | YHR020W | SRO9    | YER081W |
| YBL009W | RED1    | RPC40   | YGR103W | YLR222C |
| CDC14   | YMR117C | DBP3    | HIS4    | YOL037C |
| YPL267W | PRO1    | YOR294W | TYS1    | YIL145C |
| PDS1    | SCJ1    | KTI12   | FRS2    | YOR222W |
| BNR1    | YDL074C | HO      | YLR186W | YMR259C |
| YDL187C | HTB2    | YLR449W | YCR072C | YLR146C |
| YLR084C | YOR315W | YOR309C | YLA1    | SKT5    |
| HST1    | YGL218W | YLR413W | YDR398W | YNL227C |
| SPA2    | YMR215W | YAR075W | URA7    | YEL048C |
| YGL183C | YLR183C | YER156C | MAK16   | ATF2    |
| HST3    | YDL062W | GLY1    | EMP70   | YDR324C |
| YOR032C | YHR217C | YER049W | YDR152W | YLR285W |
| CLB3    | MEP2    | YOR145C | ZRC1    | SSF2    |
| YOR305W | TEL2    | YDR465C | RPA190  | YGL211W |
| YLL012W | YOL155C | YPL146C | YER073W | YHR048W |
| YJL218W | YPL034W | YAL036C | YMR049C | IFH1    |
| YGR242W | YHR185C | SIK1    | NIP1    | YBR002C |
| YDL186W | SSU72   | YGR145W | DPH2    | DRS1    |
| YNL033W | RCS1    | YML056C | YHR085W | YKL099C |
| YPR078C | CDC21   | YPL012W | ILS1    | GNP1    |
| YBR063C | GPI8    | YOR206W | YDR083W | YDR222W |
| STU2    | SEC14   | YER082C | YPR157W | YLR407W |
| YNL095C | YLR018C | YHR196W | YDR449C | YPL252C |
| DHS1    | YPL044C | ROK1    | ECM1    | FEN1    |
| YDR317W | YJR141W | NOP4    | DBP9    | TRP4    |
| MED7    | SKS1    | CPA2    | YLL034C | SMI1    |
| YNL319W | YLR226W | RPA43   | MPP10   | THI80   |
| YOR339C | YIL079C | SUR4    | MTR4    | YMR285C |
| YOR301W | YCR043C | ASP1    | ADE5,7  | YGR035C |
| YOR073W | YOR183W | FMI1    | YIR035C | UBP1    |
| SUT1    | YJL098W | PRM7    | YGR272C | DUT1    |
| YOR365C | SGD1    | PAB1    | BAP3    | SEC12   |
| CDC5    | YML125C | YTM1    | YOL014W | YBL042C |
| CLB1    | HIS6    | PUS1    | YJL200C | YIL064W |
| YBR152W | KEX2    | LCP5    | YHR081W | YJL118W |
| YOL047C | YOL160W | YHR148W | YKR025W | ARG11   |
| YFR012W | YOL007C | SQT1    | CLN3    | MMT1    |
| YOR029W | KAR1    | YMR223W | YDL037C | YOR013W |
| YNL034W | YOR247W | STD1    | YKR079C | STE20   |
| YPR027C | SOK2    | YKL029C | NRP1    | RPC82   |
| YLR437C | YAR064W | YOR051C | YDR045C | ENP1    |
| YPL141C | SEC72   | YNL065W | TRF5    | MSH1    |

|         |         |         |         |         |
|---------|---------|---------|---------|---------|
| YLR074C | YIL007C | YIR036C | WTM1    | YMR181C |
| YBR267W | YPL134C | YDR032C | YGR111W | YHR033W |
| YKL078W | YBR269C | YBR139W | YPR127W | YGR194C |
| YJR124C | YDL199C | YJL045W | MRF1'   | YSA1    |
| RPC19   | SDH4    | TTR1    | PRD1    | YCR076C |
| YDR299W | ARO9    | YAL060W | YPL186C | YOR084W |
| YDR365C | SIP4    | YOL153C | YNL195C | PHB2    |
| YAR1    | YDR313C | GIP2    | YKL035W | YPK2    |
| YMR014W | YOR273C | YOR289W | GDH2    | YER079W |
| YKR043C | SNC1    | HSP78   | LAP3    | HEM15   |
| HAM1    | YBL048W | YOR215C | SSE2    | YDR287W |
| YLR412W | RIM11   | YBR149W | CDC48   | YPR098C |
| YGR160W | ABF2    | YGR130C | OPI3    | YDR534C |
| YDR280W | YKL100C | YPL004C | PRE3    | SDS22   |
| SER2    | YDR202C | YLR327C | PRB1    | YDL223C |
| YPR137W | YTA1    | YER024W | YHR138C | GLC3    |
| YJR041C | YFL030W | IKS1    | JEN1    | MDG1    |
| YKL063C | YMR191W | YPR151C | CIT2    | PUT4    |
| YLR401C | YER004W | MDH3    | YTA5    | YJR008W |
| YNL114C | YDR380W | YOR019W | ATH1    | YGL082W |
| YDR346C | GLG2    | UBC8    | YTA2    | SIP2    |
| AUR1    | YKL026C | YBR280C | YAT1    | YBR214W |
| FUN53   | APE2    | GPH1    | UBC5    | MHP1    |
| AFG2    | COQ4    | CIT1    | DDI1    | YCR079W |
| YMR269W | YCL038C | YJR085C | HSP42   | YPR150W |
| AAH1    | YDL110C | YCL035C | AFR1    | YOL129W |
| YNB4    | APG1    | YBL078C | RPN5    | UFD1    |
| GCN3    | RPN4    | YPL230W | COS7    | BMH2    |
| LYS4    | PRE1    | SSA3    | NIN1    | YPL276W |
| YNR054C | MEK1    | HXT5    | GCV1    | VAC8    |
| YPL030W | FBP26   | YJL066C | YAL061W | YDR246W |
| YER002W | SEO1    | PRC1    | IDP3    | YOL084W |
| ADE4    | SDH3    | YJL021C | PUP1    | YPR172W |
| GCD6    | YMR31   | YFL006W | PBN1    | TPS2    |
| YIR020C | YPL201C | YNL194C | YMR135C | PHB1    |
| ERO1    | MRP8    | YKR018C | PRE2    | PFK26   |
| RRN3    | ECM37   | YBR230C | YGR243W | GDI1    |
| YMC2    | YSW1    | SBA1    | ACH1    | YIL087C |
| VPS9    | FUM1    | MDH1    | YLR345W | YHL021C |
| YJL212C | YPL222W | GUT1    | YHR171W | YOR042W |
| YCR016W | YPL113C | SUN2    | YDR003W | YNL274C |
| FAL1    | YJL068C | HXK1    | YCL033C | YCL039W |
| YLR179C | POR1    | YLR205C | YIL124W | ARP2    |
| YOR246C | GAC1    | FUN19   | YFR044C | PEX3    |
| YNR009W | YLR356W | HRD2    | SHP1    | YJL103C |
| YNL182C | HSP26   | NCE102  | FUN34   | PEX14   |
| RNC1    | COS8    | TES1    | YDR100W | GPA2    |
| LOS1    | PDA1    | YOL083W | PUT2    | HSP30   |
| LTV1    | YNL305C | YFL044C | YGR284C | PYC1    |
| PDR6    | YIL073C | YFR017C | YDL238C | CAK1    |
| YOR078W | YPR007C | ICL2    | YCP4    | YOR163W |
| YDL121C | PGM2    | YBL064C | SCO2    | IDH1    |
| YAR062W | LAP4    | YDR018C | TPK2    | PRE8    |

|         |         |         |         |         |
|---------|---------|---------|---------|---------|
| YML089C | VPS17   | YHR075C | ECM13   | YKR065C |
| YAP1    | YBR056W | TPK1    | YGR052W | YDR084C |
| UBP2    | YCR010C | YGR080W | YFR003C | YGR205W |
| YOR035C | PRE10   | PUP3    | YBR241C | YBR273C |
| YPT52   | MDH2    | YAL049C | YJL185C | RVS167  |
| YFR010W | ACR1    | YJR149W | YLR219W | YNL208W |
| FAA2    | HSP104  | YJL163C | YJR044C | YPR193C |
| PRE4    | YDL204W | YNL200C | YLR070C | SEN3    |
| YPL196W | YJL142C | YNL115C | GPD1    | SCL1    |
| YET1    | YER067W | YML117W | GPM2    | APE3    |
| ADP1    | CPR6    | YML090W | YOL082W | YAL028W |
| AMS1    | PHO85   | YDR512C | YOL087C | SCC3    |
| PEP4    | YPR192W | YHR198C | YSC84   | YDR031W |
| ECM4    | DOA4    | PGS1    | YDL091C | YBR125C |
| YOR100C | ECM29   | YIL088C | YNL134C | SRV2    |
| YDL222C | YKL151C | YNL127W | YIL042C | YMR323W |
| STF2    | YKL034W | YDR453C | YLR001C | TIP1    |
| UGA1    | YOR223W | YOR161C | TIN1    | SHY1    |
| YGR043C | NCA2    | UBP13   | YDR214W | YLL015W |
| YDL124W | YDR061W | NAM8    | ALD3    | YKL187C |
| SOL4    | YGL250W | YFL042C | YPL109C | TFS1    |
| MLS1    | GLG1    | YGR101W | YLR177W | YGR127W |
| YGR067C | YBR216C | YIL010W | KNS1    | FAT2    |
| YAK1    | SNF3    | YLL020C | YGL146C | DLD1    |
| YDR070C | YDR231C | COX15   | YBR151W | YDL206W |
| SDH2    | DPL1    | YOL073C | YGL219C | YDL019C |
| SIP18   | YMR099C | YER096W | YTP1    | GSY2    |
| HSP12   | INP54   | YLR097C | ICL1    | YLR270W |
| YML128C | YIR016W | YML131W | GLO4    | YDL072C |
| YFL043C | YOL053W | PTK2    | YMR315W | YPR030W |
| YIR038C | YHR112C | YBR052C | YLL023C | YDR425W |
| YGR086C | YCR083W | REG2    | CYP2    | SDH1    |
| GLK1    | YER063W | YGR235C | SEC1    | DBI56   |
| OM45    | YHR159W | YIL105C | YJL020C | SOD2    |
| YGL037C | MAL33   | SPL2    | TRX2    | UBA1    |
| YOR173W | YKL091C | YDR391C | CMK1    | YMR031C |
| YMR250W | TRR2    | YLR201C | PRP12   | YHR087W |
| YHR097C | ERS1    | YER121W | PHR1    | YKL195W |
| GSY1    | PEX10   | YJL003W | CYB2    | YLR118C |
| HYR1    | YGR011W | YDR255C | YIL041W | YMR103C |
| ISF1    | MRPL28  | YGR161C | YML118W | PAI3    |
| YGL081W | MDR1    | YPR083W | FBP1    | YOR228C |
| YKR011C | YDR107C | YDR386W | YGR232W | COX17   |
| YMR110C | YOL060C | YBR016W | YCR068W | GLO2    |
| GLO1    | YDR063W | YDR055W | CAP2    | YBL047C |
| DIP5    | PRM4    | YJL144W | YPT53   | PMC1    |
| YBR285W | YKR003W | SCD5    | YDL237W | ATP3    |
| PEP12   | YJR126C | CTF19   | YGL161C | GCY1    |
| GDH3    | ERG9    | PTP1    | YGL121C | DNM1    |
| PCK1    | MDS3    | GLC8    | CBP4    | YCR030C |
| GYP7    | CIS1    | MRS4    | YKR017C | YLR251W |
| PBI2    | YKL105C | YLR004C | HRD3    | NDI1    |
| YAR027W | YNL212W | NHX1    | YHR140W | SSD1    |
| YGP1    | YOR227W | MBR1    | ARP3    | YDR475C |
| CPH1    | PEP8    | YNL045W | YJR080C | YDR358W |

|         |         |         |
|---------|---------|---------|
| YMR027W | YFR024C | HXT6    |
| YBL098W | EST1    | NCA3    |
| GND2    | YDL025C | YLR423C |
| YCL042W | YBL095W | YGR212W |
| TPS1    | YLR241W | YBR157C |
| YIL036W | YDR230W | STB5    |
| TSL1    | YMR006C | YGL084C |
| SRA1    | YEL066W | YPL079W |
| YGR023W | YPR115W | RPL17   |
| STB2    | YDR203W | RPS25   |
| YPL100W | SIS1    | RPL35A  |
| YJR096W | YMR251W | YBL086C |
| YDL016C | SSA2    | PDC6    |
| TKL2    | MDJ1    | PCL8    |
| JSN1    | YLR193C | RPS24A  |
| COQ6    | YDR511W | IRA2    |
| ZWF1    | YOR135C | RPLA3   |
| MAP2    | YMR030W | THI4    |
| IDP2    | PIP2    | PMA2    |
| ECM15   | YEL033W | RPL47A  |
| CTT1    | MSP1    | ROD1    |
| YGR026W | YMR007W | YLR297W |
| XBP1    | YMR025W | UBR1    |
| YBL013W | YPR140W |         |
| YDR154C | YMR304W |         |
| ADE16   | HXT7    |         |
| YBR116C | YLR149C |         |
| GCV2    | GSP2    |         |
| YPL277C | YEL020C |         |
| UBI4    | YBR223C |         |
| PEL1    | YKL123W |         |
| YOR121C | YML087C |         |
| YLR164W | GRE2    |         |
| ABP1    | ADE17   |         |
| YLR252W | YBR006W |         |
| YLR109W | VPS15   |         |
| YHR004C | YAL055W |         |
| FUN31   | YBR033W |         |
| SSH4    | YMR009W |         |
| YMR322C | YOL150C |         |
| YBR137W | PYK2    |         |
| PIR3    | CHA1    |         |
| YHR001W | AST2    |         |
| YFR011C | YER135C |         |
| RAS2    | YBR047W |         |
| YDL086W | YOR087W |         |
| YML029W | ALD6    |         |
| PET54   | YBR150C |         |
| YDL218W | YPL170W |         |
| OCH1    | OYE3    |         |
| DAK1    | PEX8    |         |
| PIM1    | FUN14   |         |
| VPS13   | ENO1    |         |
| YIL029C | SPS100  |         |



Supplementary Table S10: rRNA processing genes

The rRNA processing genes are listed. The average pattern ( $\log_2$ ratio) is plotted upon transfer to YPD (which was followed for 5, 20 and 40 minutes after the transfer). The genes in the group, along with a one line description, are indicated.

| Average expression:                                                                                                                                                | 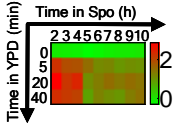 |
|--------------------------------------------------------------------------------------------------------------------------------------------------------------------|-----------------------------------------------------------------------------------|
| URA7; YBL0410; YBL039C CTP synthase final step in pyrimidine biosynthesis pathway                                                                                  |                                                                                   |
| KRR1; YCL059C Protein essential for cell division and spore germination                                                                                            |                                                                                   |
| YDR101C; YD8557.10 Protein of unknown function                                                                                                                     |                                                                                   |
| YDR496C; D9719.2 Protein of unknown function                                                                                                                       |                                                                                   |
| YER006W Nuclear protein of unknown function, has similarity to mouse Mmr1 protein                                                                                  |                                                                                   |
| DBP3; G3210; YGL078C ATP-dependent RNA helicase CA3; member of the DEAD/DEAH box family                                                                            |                                                                                   |
| ROK1; G1651; YGL171W ATP-dependent RNA helicase required for rRNA processing, member of DEAD box family                                                            |                                                                                   |
| YGR103W; G5933 Nuclear protein of unknown function with similarity to zebrafish pescadillo                                                                         |                                                                                   |
| YGR145W; G6623 Component of NuA3 histone acetyltransferase complex                                                                                                 |                                                                                   |
| SDA1; G9101; YGR245C Essential protein required for normal organization of the actin cytoskeleton                                                                  |                                                                                   |
| NMD3; SRC5; YHR170W Protein involved in the nuclear export of 60S ribosomal subunits                                                                               |                                                                                   |
| YHR197W Component of NuA3 histone acetyltransferase complex                                                                                                        |                                                                                   |
| YKR081C; YKR401 Protein of unknown function                                                                                                                        |                                                                                   |
| DRS1; L1345; YLL008W RNA helicase of the DEAD box family involved in rRNA biogenesis                                                                               |                                                                                   |
| YLR009W; L1551 Possible ribosomal protein with similarity to ribosomal protein L24                                                                                 |                                                                                   |
| PWP1; L8167.10; YLR196W Periodic tryptophan protein, has WD (WD-40) repeats                                                                                        |                                                                                   |
| YLR222C; CST29; L8083.8 Protein of unknown function, overproduction causes chromosome instability and increased mitotic recombination, contains WD (WD-40) repeats |                                                                                   |
| DBP9; L9328.3; YLR276C Protein with similarity to DEAD box RNA helicases                                                                                           |                                                                                   |
| YLR409C; L8084.22 Protein of unknown function, has WD (WD-40) repeats                                                                                              |                                                                                   |
| YML093W Protein of unknown function                                                                                                                                |                                                                                   |
| RSA2; YM9553.07; YMR131C Protein involved in ribosome assembly, member of WD (WD-40) repeat family                                                                 |                                                                                   |
| HAS1; YMR290C RNA helicase of the DEAD/DEAH box family                                                                                                             |                                                                                   |
| YNL110C; N1954 Protein of unknown function, contains one RNA recognition (RRM) domain                                                                              |                                                                                   |
| KRE33; N1216; N1858; YNL132W Protein of unknown function                                                                                                           |                                                                                   |
| YNL174W; N1669 Protein of unknown function                                                                                                                         |                                                                                   |
| YNL182C; N1636 Protein of unknown function                                                                                                                         |                                                                                   |
| RPA49; N0880; YNL248C RNA polymerase I third largest subunit                                                                                                       |                                                                                   |
| BRX1; O1115; YOL077C Protein required for biogenesis of the 60S ribosomal subunit, localized to the nucleolus                                                      |                                                                                   |
| YOR206W; O4843; YOX001 Protein of unknown function                                                                                                                 |                                                                                   |

Supplementary Table S11: Gluconeogenesis genes

The gluconeogenesis genes are listed. The average pattern ( $\log_2$ ratio) is plotted upon transfer to YPD (which was followed for 5, 20 and 40 minutes after the transfer). The genes in the group, along with a one line description, are indicated.

| Average expression:                                                                                                                                                                                                                                          | 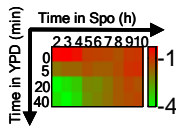 |
|--------------------------------------------------------------------------------------------------------------------------------------------------------------------------------------------------------------------------------------------------------------|-----------------------------------------------------------------------------------|
| SPG2; YCR010C Protein of unknown function, has strong similarity to Ydr384p and Ynr002p                                                                                                                                                                      |                                                                                   |
| ICL1; YER065C Isocitrate lyase, carries out part of the glyoxylate cycle, required for gluconeogenesis                                                                                                                                                       |                                                                                   |
| YFL030W Putative alanine glyoxylate aminotransferase (serine pyruvate aminotransferase)                                                                                                                                                                      |                                                                                   |
| YGR067C; G4548 Protein of unknown function, has two tandem zinc finger domains                                                                                                                                                                               |                                                                                   |
| HXT5; YHR096C Member of the hexose transporter family of the major facilitator superfamily (MFS)                                                                                                                                                             |                                                                                   |
| YIL057C Protein of unknown function                                                                                                                                                                                                                          |                                                                                   |
| MBR1; YKL425; YKL440; YKL093W Protein involved in mitochondrial biogenesis                                                                                                                                                                                   |                                                                                   |
| YKL187C Protein with similarity to 4-mycarosyl isovaleryl-CoA transferase                                                                                                                                                                                    |                                                                                   |
| JEN1; YKL217W Pyruvate and lactate-proton symporter, member of the major facilitator superfamily (MFS)                                                                                                                                                       |                                                                                   |
| PCK1; PPC1; JPM2; PEPC YKR097W Phosphoenolpyruvate carboxykinase (ATP), rate limiting gluconeogenic enzyme                                                                                                                                                   |                                                                                   |
| IDP2; L9470.12; YLR174W Isocitrate dehydrogenase (NADP+), cytosolic                                                                                                                                                                                          |                                                                                   |
| FBP1; L8039.18; YLR377C Fructose-1,6-bisphosphatase, gluconeogenic enzyme, activity is inhibited by protein kinase A-mediated phosphorylation                                                                                                                |                                                                                   |
| CYB2; YM9958.08; YML054C Cytochrome b2 [L-(+)-lactate cytochrome c oxidoreductase] converts L-lactate to pyruvate                                                                                                                                            |                                                                                   |
| YMR107W; YM9718.06 Protein of unknown function, induced during aerobic growth                                                                                                                                                                                |                                                                                   |
| YMR206W; YM8325.07 Protein of unknown function                                                                                                                                                                                                               |                                                                                   |
| MLS1; N1921; YNL117; YNL117W Malate synthase 1, functions in glyoxylate cycle, has near identity to Dal7p                                                                                                                                                    |                                                                                   |
| YNL194C; N1394 Protein with similarity to Sur7p                                                                                                                                                                                                              |                                                                                   |
| YNL195C; N1390 Protein of unknown function, induced during aerobic growth                                                                                                                                                                                    |                                                                                   |
| YNR002C; N2029; (FUN34) Protein of unknown function, has strong similarity to Ycr010p and Ydr384p                                                                                                                                                            |                                                                                   |
| CRC1; CAC YOR3193; O3193; YOR100C Mitochondrial carnitine carrier, member of the mitochondrial carrier family (MCF) of membranetransporters                                                                                                                  |                                                                                   |
| GAC1; O4625; YOR178C Regulatory subunit for protein serine/threonine phosphatase Glc7p                                                                                                                                                                       |                                                                                   |
| LEE1; LPE18; YPL054W Protein of unknown function                                                                                                                                                                                                             |                                                                                   |
| PXA1; PAL1; SSH2; LPI1; PAT2; P2607; YPL147W Protein required for long-chain fatty acid transport across the peroxisomal membrane, member of the ATP-binding cassette (ABC) superfamily, has similarity to a human gene associated with adrenoleukodystrophy |                                                                                   |
| YPL201C; P1870 Protein of unknown function, induced during aerobic growth                                                                                                                                                                                    |                                                                                   |
| CSR2; MRG19; YP9367.10; YPR030W Protein of unknown function                                                                                                                                                                                                  |                                                                                   |

Supplementary Table S12: Ribosomal Proteins

The ribosomal protein genes are listed. The average pattern ( $\log_2$  ratio) is plotted upon transfer to YPD (which was followed for 5, 20 and 40 minutes after the transfer). The genes in the group, along with a one line description, are indicated.

| Average expression:                                                                                                                                                   | 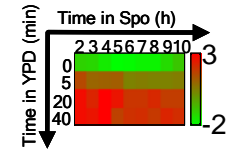 |
|-----------------------------------------------------------------------------------------------------------------------------------------------------------------------|-----------------------------------------------------------------------------------|
| RPL19B; YBL0424; YBL027W Ribosomal protein L19 (yeast L23; YL14; rp15L; rp33; rat L19), nearly identical to Rpl19Ap                                                   |                                                                                   |
| RPS8A; (RPS14A); (RP19); YBL06.05; YBL0613; YBL072C Ribosomal protein S8 (yeast S14; YS9; rp19; mammalian S8), identical to Rps8Bp                                    |                                                                                   |
| RPL23A; YBL0713; YBL087C Ribosomal protein L23 (yeast L17a; YL32; E. coli L14; rat L23), nearly identical to Rpl23Bp                                                  |                                                                                   |
| RPS11B; YBR0501; YBR048W Ribosomal protein S11 (yeast S18, YS12, rp41, E. coli S17, human and rat S11), identical to Rps11Bp                                          |                                                                                   |
| RPS6B; (RPS10A); RPS101; YBR1244; YBR181C Ribosomal protein S6 (yeast S10; YS4; rp9; human, mouse, and rat S6), identical to Rps6Ap                                   |                                                                                   |
| RPL21A; URP1A; URP1; YBR1401; YBR191W Ribosomal protein L21 (rat L21), nearly identical to Rpl21Bp                                                                    |                                                                                   |
| RPS14A; CRY1; (RP59); YCR59; YCR031C Ribosomal protein S14A (rp59, E. coli S11, rat and human S14) involved in cryptopleurine resistance, nearly identical to Rps14Bp |                                                                                   |
| RPS29B; D2542; YDL061C Ribosomal protein S29 (yeast S36; YS29; rat S29), similar to Rps29Ap                                                                           |                                                                                   |
| RPL31A; D2478; YDL075W Ribosomal protein L31 (yeast L34; YL36; YL28; rat L31), nearly identical to Rpl31Bp                                                            |                                                                                   |
| RPP1A; RPLA1; (RPA1); YP1ALPHA; L12eIIA; D2450; YDL081C Acidic ribosomal protein P1A (A1 YP1alpha; E. coli L12eIIA; human and rat P1)                                 |                                                                                   |
| RPL13A; D2445; YDL082W Ribosomal protein L13 (rat L13), nearly identical to Rpl13Bp                                                                                   |                                                                                   |
| RPS16B; D2442; YDL083C Ribosomal protein S16 (rp61R rat S16), identical to Rps16Ap                                                                                    |                                                                                   |
| RPL35B; SOS2; D2170; YDL136W Ribosomal protein L35 (rat L35), identical to Rpl35Ap                                                                                    |                                                                                   |
| RPL35A; SOS1; D1249; YDL191W Ribosomal protein L35 (rat L35), identical to Rpl35Bp                                                                                    |                                                                                   |
| RPS11A; PZA156; D9813.03; D3278; YDR025W Ribosomal protein S11 (yeast S18; YS12; rp41; E. coli S17; human and rat S11), identical to Rps11Bp                          |                                                                                   |
| RPS13; YS15; YD9609.18; D4252; YDR064W Ribosomal protein S13 (yeast S27; YS15; rat S13)                                                                               |                                                                                   |
| RPP2B; RPLA4; RPL45; L12eIA; L36; YPA1; D9481.1; D9509.2; YDR382W Acidic ribosomal protein P2B (L45 YPA1; YL44C; YP2 beta E. coli L12eIA; human and rat P2)           |                                                                                   |
| RPL12B; D9461.7; YDR418W Ribosomal protein L12 (yeast L15; YL23; E. coli L11; rat L12a), identical to Rpl12Ap                                                         |                                                                                   |
| RPS17B; RP51B; D9461.32; YDR447C Ribosomal protein S17 (rp51 rat S17), nearly identical to Rpl17Ap                                                                    |                                                                                   |
| RPS18A; YDR450W; RPS13C; D9461.35 Ribosomal protein S18 (E. coli S13; rat S18), identical to Rps18Bp                                                                  |                                                                                   |
| RPL27B; D8035.14; YDR471W Ribosomal protein L27 (yeast L27; mammalian L27), identical to Rpl27Ap                                                                      |                                                                                   |
| RPL37B; D9719.6; YDR500C Ribosomal protein L37 (yeast L46) (rat L37), nearly identical to Rpl37Bp                                                                     |                                                                                   |
| RPL12A; YEL054C Ribosomal protein L12 (yeast L15; YL23; E. coli L11; rat L12b), identical to Rpl12Bp                                                                  |                                                                                   |
| RPS24A; YER074W Ribosomal protein S24 (rat S24), identical to Rps24Bp                                                                                                 |                                                                                   |
| RPS8B; (RPS14B); (RP19); YER102W Ribosomal protein S8 (yeast S14; YS9; rp19; mammalian S8), identical to Rps8Ap                                                       |                                                                                   |
| RPL23B; YER117W Ribosomal protein L23 (yeast L17a; YL32; E. coli L14; rat L23), nearly identical to Rpl23Ap                                                           |                                                                                   |
| RPS26B; YER131W Ribosomal protein S26 (rat S26), nearly identical to Rps26Ap                                                                                          |                                                                                   |
| RPL30; (RPL32); G3652; YGL030W Large-subunit ribosomal protein L30 (yeast L32; YL38; rp73; mouse and rat L30)                                                         |                                                                                   |
| RPL24A; G3648; YGL031C Ribosomal protein L24A (yeast L30; rp29; YL21; rat L24), nearly identical to Rpl24Bp                                                           |                                                                                   |

|                                                                                                                                                                                                 |
|-------------------------------------------------------------------------------------------------------------------------------------------------------------------------------------------------|
| RPL7A; YL8A; G3216; YGL076C Ribosomal protein L7 (yeast L6; YL8A; rp11; E. coli L30; rat L7), nearly identical to Rpl7Bp                                                                        |
| RPL28; CYH2; G3101; YGL103W Ribosomal protein L28 (yeast L29; YL24; rp44; mouse and rat L27a)                                                                                                   |
| RPS2; (RPS4); SUP44; G2893; YGL123W Ribosomal protein S2 (yeast S4; YS5; YP9; rp12; E. coli S5; rat S2)                                                                                         |
| RPL1B; SSM1B; SSM2; G2834; YGL135W Large subunit ribosomal protein L1 (rat L10A; eubacterial L1; archeal L1), identical to Rpl1Ap                                                               |
| RPL9A; RP25; YL11; G2505; YGL147C Ribosomal protein L9 (YL11 rp25; rp24; E. coli L6; rat L9), nearly identical to Rpl9Bp                                                                        |
| RPS25A; RPS31A; G4046; YGR027C Ribosomal protein S25A (yeast S31; YS23; rp45; rat S25), identical to Rps25Bp                                                                                    |
| RPL26B; G4079; YGR034W Ribosomal protein L26 (yeast L33; YL33; rat L26), nearly identical to Rpl26Ap                                                                                            |
| RPL11B; G4620; YGR085C Ribosomal protein L11 (yeast L16; YL22; rp39B; E. coli L5; rat L11), nearly identical to Rpl11Ap                                                                         |
| RPS23A; (RPS28A); G6178; YGR118W Ribosomal protein S23 (yeast S28; rp37; YS14; E. coli S12; rat S23), identical to Rps23Bp                                                                      |
| RPL24B; G6635; YGR148C Ribosomal protein L24B (yeast L30; rp29; YL21; rat L24), nearly identical to Rpl24Ap                                                                                     |
| RPS0A; YST1; (NAB1); NAB1A; G7816; YGR214W Ribosomal protein S0 (E. coli S2; rat Sa), nearly identical to Rps0Bp                                                                                |
| RPL14B; YHL001W Ribosomal protein L14 (mammalian L14), nearly identical to Rpl14Ap                                                                                                              |
| RPS20; URP2; YHL015W Ribosomal protein S20 (E. coli S10; Xenopus S22; rat and human S20)                                                                                                        |
| RPL8A; MAK7; YHL033C Ribosomal protein L8 (yeast L4; rp6; YL5; human, mouse, and rat L7a), involved in maintenance of M1 dsRNA virus;nearly identical to Rpl8Bp                                 |
| RPL27A; YHR010W Ribosomal protein L27 (yeast L27; mammalian L27), identical to Rpl27Bp                                                                                                          |
| RPS27B; SLO81; YHR021C Ribosomal protein S27 (yeast S27; rp61; YS20; mammalian S27), nearly identical to Rps27Ap                                                                                |
| RPL42B; MAK18; SCL41B; YHR141C Ribosomal protein L42 (yeast L41; YL27; YP44; human and rat L36A), involved in replication of M1 and M2double-stranded RNA (dsRNA) viruses, identical to Rpl42Ap |
| RPS4B; (RPS4); (RPS7A); YHR203C Ribosomal protein S4 (yeast S7; YS6; rp5; rat and human S4), identical to Rps4Ap                                                                                |
| RPL2B; RPL5A; YL6b; YI3299.13; YIL018W Ribosomal protein L2 (yeast L5; YL6; rp8; E. coli L2; tobacco L2; rat L8)                                                                                |
| RPL34B; YIL052C Ribosomal protein L34 (rat L34), nearly identical to Rpl34Ap                                                                                                                    |
| RPL16A; YIL133C Ribosomal protein L16 (rp22), nearly identical to Rpl16Bp                                                                                                                       |
| RPL40A; UBI1; CEP52A; CST2; YIL148W Fusion protein whose N-terminal half is ubiquitin and whose C-terminal half is ribosomal protein L40(rat L40), identical to Rpl40Bp                         |
| RPS21B; (RPS26B); J0664; YJL136C Ribosomal protein S21 (yeast S26; YS25; rat S21), identical to Rps21Ap                                                                                         |
| TIF2; J0660; YJL138C Translation initiation factor 4A (eIF4A) of the DEAD box family, identical to Tif1p                                                                                        |
| RPL17B; J0493; YJL177W Ribosomal protein L17 (yeast L20; YL17; E. coli L22; rat and human L17), nearly identical to Rpl17Ap                                                                     |
| RPS22A; (RPS24); J0355; YJL190C Ribosomal protein S22 (yeast S24; rp50; YS22; rat S15A), nearly identical to Rps22Bp                                                                            |
| RPS5; J2045; YJR123W Ribosomal protein Rps5p (rp14 YS8; S2; mammalian S5) of the small subunit                                                                                                  |
| RPS4A; (RPS4); (RPS7B); J2186; YJR145C Ribosomal protein S4 (yeast S7; YS6; rp5; rat and human S4), identical to Rps4Bp                                                                         |
| RPL14A; YKL153; YKL006W Ribosomal protein L14 (mammalian L14), nearly identical to Rpl14Bp                                                                                                      |
| YKL056C; YKL312 Protein possibly involved in cytoplasmic ribosome function, has similarity to translationally controlled tumor protein (TCTP) ofanimal cells and higher plants                  |
| RPS27A; YKL156W Ribosomal protein S27 (yeast S27; rp61; YS20; mammalian S27), nearly identical to Rps27Bp                                                                                       |
| RPL17A; YKL180W Ribosomal protein L17 (yeast L20; YL17; E. coli L22; rat and human L17), nearly identical to Rpl17Bp                                                                            |
| RPS21A; (RPS26A); YKR057W Ribosomal protein S21 (yeast S26; YS25; rat S21), identical to Rps21Bp                                                                                                |
| TIF1; YKR059W Translation initiation factor 4A (eIF4A) of the DEAD box family, identical to Tif2p                                                                                               |
| RPL40B; UBI2; CEP52B; CST1; YKR414; YKR094C Fusion protein comprised of ribosomal protein L40 (C-terminal half) and ubiquitin(N-terminal half), (rat L40), identical to Rpl40Ap                 |
| RPL8B; KRB1; L0717; YLL045C Ribosomal protein L8 (yeast L4; rp6; YL5; human, rat, and mouse L7a),                                                                                               |

|                                                                                                                                                                               |
|-------------------------------------------------------------------------------------------------------------------------------------------------------------------------------|
| involved in maintenance of M1 dsRNA virus nearly identical to Rpl8Ap                                                                                                          |
| RPL15A; L1755; YLR029C Ribosomal protein L15 (yeast L13; YL10; rp15R; rat L15), nearly identical to Rpl15Bp                                                                   |
| RPS0B; YST2; NAB1B; L2118; YLR048W Ribosomal protein S0 (E. coli S2; rat Sb), nearly identical to Rps0Ap                                                                      |
| RPL22A; YL31; L2168; YLR061W Ribosomal protein L22, similar to Rpl22Bp                                                                                                        |
| RPL10; GRC5; QSR1; L2341; YLR075W Ribosomal protein L10 (yeast L9)                                                                                                            |
| RPS31; UBI3; L9470.14; YLR167W Fusion protein comprised of ribosomal protein S31 at the C-terminal half fused to ubiquitin at the N-terminal half (yeast S37; YS24; rat S27a) |
| RPL37A; L9470.6; YLR185W Ribosomal protein L37 (yeast L46; rat L37), nearly identical to Rpl37Bp                                                                              |
| RPS28B; L8479.5; YLR264W Ribosomal protein S28 (yeast S33; YS27; mammalian S28), nearly identical to Rps28Ap                                                                  |
| RPL38; L8543.2; YLR325C Ribosomal protein L38                                                                                                                                 |
| RPS25B; RPS31B; L8300.10; YLR333C Ribosomal protein S25B (yeast S31; YS23; rp45; rat S25), identical to Rps25Ap                                                               |
| SUR4; (APA1); VBM1; ELO3; SRE1; L8039.2; YLR372W Protein required for the conversion of 24-carbon fatty acids to 26-carbon fatty acids                                        |
| RPS29A; L8084.11; YLR388W Ribosomal protein S29 (yeast S36; YS29; rat S29), similar to Rps29Bp                                                                                |
| RPS1A; RP10A; (PLC1); L9753.9; YLR441C Ribosomal protein S1 (rp10 rat S3A), nearly identical to Rps1Bp                                                                        |
| RPL6B; L9324.4; YLR448W Ribosomal protein L6 (yeast L17B; YL16B; human L6), nearly identical to Rpl6Ap                                                                        |
| RPS17A; RP51A; YML024W Ribosomal protein S17 (rp51 rat S17), nearly identical to Rps17Bp                                                                                      |
| RPS18B; YML026C Ribosomal protein S18 (E. coli S13; rat S18), identical to Rps18Ap                                                                                            |
| RPS1B; RP10B; RP3B; PLC2; KRP-Y1; YML063W Ribosomal protein S1 (rp10 rat S3A), nearly identical to Rps1Ap                                                                     |
| RPL6A; YML073C Ribosomal protein L6 (yeast L17A; YL16A; human L6), nearly identical to Rpl6Bp                                                                                 |
| ASC1; BEL1; CPC2; YM9718.15; YMR116C Ribosomal protein of the 40S ribosomal subunit that influences translational efficiency and cell size, contains two WD (WD-40) repeats   |
| RPL13B; YM9375.11; YMR142C Ribosomal protein L13 (rat L13), nearly identical to Rpl13Ap                                                                                       |
| RPL36A; YM9646.06; YMR194W Ribosomal protein L36 (yeast L39; YL39; rat L36), nearly identical to Rpl36Bp                                                                      |
| GUA1; YM8261.11; YMR217W GMP synthetase, catalyzes the amination of xanthine monophosphate to guanine monophosphate in the guanine branch of the purine biosynthesis pathway  |
| RPL20A; YM9408.04; YMR242C Ribosomal protein L20, nearly identical to Rpl20Bp                                                                                                 |
| RPL9B; N2406; YNL1611; YNL2406; YNL067W Ribosomal protein L9 (YL11 rp25; rp24; E. coli L6; rat L9), nearly identical to Rpl9Ap                                                |
| RPL16B; N2377; YNL069C Ribosomal protein L16 (rp23), nearly identical to Rpl16Ap                                                                                              |
| RPS7B; N2212; YNL096C Ribosomal protein S7 (rp30 human S7; Xenopus S8), nearly identical to Rps7Ap                                                                            |
| RPL42A; SCL41A; N1722; YNL162W Ribosomal protein L42 (yeast L41; YL27; YP44; human and rat L36A), identical to Rpl42Bp                                                        |
| RPS3; RP13; SUF14; N1653; YNL178W Ribosomal protein S3 (rp13 YS3; mammalian S3), has a possible KH domain                                                                     |
| SSB2; N1333; YNL209W Heat shock protein of HSP70 family, cytoplasmic                                                                                                          |
| RPL18B; RP28B; N0425; YNL0425; YNL301C Ribosomal protein L18 (rp28 rat L18), identical to Rpl18Ap                                                                             |
| RPS19B; RP55B; (RPS16B); N0422; YNL0422; YNL302C Ribosomal protein S19 (rp55 YS16B; rat S19), nearly identical to Rps19Ap                                                     |
| RPP2A; RPLA2; RPL44; (RPA2); L12eIB; L35; O2060; YOL039W Acidic ribosomal protein P2A (L44 A2; YP2alpha; E. coli L12eIB; human P2alpha), plays a role in the elongation step  |
| RPS15; RPS21; O2057; YOL040C Ribosomal protein S15 (yeast S21; rp52; E. coli S19; rat S15; RIG protein)                                                                       |
| RPL18A; RP28A; O0565; YOL120C Ribosomal protein L18 (rp28 rat L18), identical to Rpl18Bp                                                                                      |
| RPS19A; RP55A; (RPS16A); O0559; YOL121C Ribosomal protein S19 (rp55 YS16A; rat S19), nearly identical to Rps19Bp                                                              |
| RPL25; O0534; YOL127W Ribosomal protein L25 (YL25 rp61L; E. coli L23; rat L23a)                                                                                               |
| RPL3; TCM1; MAK8; O2812; YOR29-14; YOR063W Ribosomal protein L3 (YL1 rp1; rat L3), responsible for trichodermin resistance and involved in maintenance of dsRNA viruses       |
| RPS7A; RP30; YOR3177; O3177; YOR096W Ribosomal protein S7 (rp30 human S7; Xenopus S8), nearly                                                                                 |

|                                                                                                                                   |
|-----------------------------------------------------------------------------------------------------------------------------------|
| identical to Rps7Bp                                                                                                               |
| RPS28A; O3598; YOR167C Ribosomal protein S28 (yeast S33; YS27; mammalian S28), nearly identical to Rps28Bp                        |
| RPL33B; O5224; YOR234C Ribosomal protein L33 (yeast L37; YL37; rp47; rat L35A), nearly identical to Rpl33Ap                       |
| RPS10A; O5611; YOR293W Ribosomal protein S10 (rat S10), nearly identical to Rps10Bp                                               |
| RPL20B; O6116; YOR312C Ribosomal protein L20, nearly identical to Rpl20Ap                                                         |
| RPS12; RS12; O6673; YOR369C Ribosomal protein S12 (rat S12)                                                                       |
| EGD1; CST25; P7102.13; YPL037C Beta subunit of the nascent polypeptide-associated complex                                         |
| RPL21B; URP1B; LPF6; YPL079W Ribosomal protein L21 (rat L21), nearly identical to Rpl21Ap                                         |
| RPS6A; (RPS10B); RPS102; LPG18; YPL090C Ribosomal protein S6 (yeast S10; YS4; rp9; human, mouse, and rat S6), identical to Rps6Bp |
| RPL33A; LPI4; P2625; YPL143W Ribosomal protein L33 (yeast L37; YL37; rp47; rat L35A), nearly identical to Rpl33Bp                 |
| RPL1A; SSM1A; SSM1; P1740; YPL220W Large subunit ribosomal protein L1 (rat L10A; eubacterial L1; archeal L1), identical to Rpl1Bp |
| RPL11A; P8283.14; YPR102C Ribosomal protein L11 (yeast L16; YL22; rp39A; E. coli L5; rat L11), nearly identical to Rpl11Bp        |
| RPS23B; (RPS28B); P9659.9; YPR132W Ribosomal protein S23 (yeast S28; rp37; YS14; E. coli S12; rat S23), identical to Rps23Ap      |
| RPL19A; YBR084C-A Ribosomal protein L19 (yeast L23; YL14; rp15L; rp33; rat L19), nearly identical to Rpl19Bp                      |
| RPL34A; YER056C-A Ribosomal protein L34 (rat L34), nearly identical to Rpl34Bp                                                    |
| RPL2A; YL6; YFR031C-A Ribosomal protein L2 (Yeast L5; YL6; rp8; E. coli L2; tobacco L2; rat L8)                                   |

Supplementary Table S13: Genes induced in a timely dependent manner

The average pattern ( $\log_2$ ratio) is plotted upon transfer to YPD (which was followed for 5, 20 and 40 minutes after the transfer). The genes in the group, along with a one line description, are indicated.

Template genes used to create this group are: *YIRO38C*, *YHR087W*, *YDL222C*, *YMR250W*, *SIP18*, *SPS100* and *YMR322C*

| Average expression of genes induced in a timely dependent manner                                                                                                        | 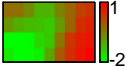 |
|-------------------------------------------------------------------------------------------------------------------------------------------------------------------------|-----------------------------------------------------------------------------------|
| YBR116C; YBR0911 Protein of unknown function                                                                                                                            |                                                                                   |
| TKL2; YBR0912; YBR117C Transketolase 2                                                                                                                                  |                                                                                   |
| YBR241C; YBR1625 Member of the hexose transporter family of the major facilitator superfamily (MFS)                                                                     |                                                                                   |
| DIA3; D2815; YDL024C Protein with similarity to acid phosphatases                                                                                                       |                                                                                   |
| YDL072C; D2492 Protein of unknown function                                                                                                                              |                                                                                   |
| YDL124W; D2240 Protein of unknown function                                                                                                                              |                                                                                   |
| SFA1; SFA D1473; YDL168W Long-chain alcohol dehydrogenase (ADH) with similarity to mammalian ADH class III                                                              |                                                                                   |
| YDL204W; D1062 Protein of unknown function                                                                                                                              |                                                                                   |
| YDL218W; D0879 Protein of unknown function induced during aerobic growth, has weak similarity to Ynr061p                                                                |                                                                                   |
| YDL221W; D0855 Protein of unknown function                                                                                                                              |                                                                                   |
| YDL222C; D0850 Protein with similarity to Sur7p                                                                                                                         |                                                                                   |
| YDL223C; D0843 Protein with repeated region characteristic of neuraxin and Map1b proteins, also has ATP/GTP-binding site motif A                                        |                                                                                   |
| PST2; D3422; YD9673.02; YDR032C Protein with similarity to Ycp4p and <i>S. pombe</i> OBR1 brefeldin A resistance protein                                                |                                                                                   |
| YDR070C; YD8554.03; D4275 Protein of unknown function                                                                                                                   |                                                                                   |
| TPS2; HOG2; PFK3; D4416; YD8554.07; YDR074W Trehalose-6-phosphate phosphatase, component of the trehalose-6-phosphatasesynthase/phosphatase complex                     |                                                                                   |
| YDR119W; YD9727.14 Member of the 14-spanner drug:[H+] antiporter (DHA14) family of multidrug-resistance (MFS-MDR) proteins in the majorfacilitator superfamily (MFS)    |                                                                                   |
| YDR154C Protein of unknown function                                                                                                                                     |                                                                                   |
| DIT1; D9509.21; YDR403W First enzyme in the pathway for biosynthesis of dityrosine in the outer layer of the spore wall expressed late (10-16hr) in sporulation         |                                                                                   |
| HSP12; GLP1; YFL014W Heat shock protein of 12 kDa, induced by heat, osmotic stress, oxidative stress and in stationary phase                                            |                                                                                   |
| OCH1; NGD29; G3626; YGL038C Alpha-1,6-mannosyltransferase, involved in initiation of mannose outer chain elongation of N-linkedoligosaccharides of type Man[9]GlcNac[2] |                                                                                   |
| YGL059W; G3441 Protein with similarity to human branched-chain alpha-ketoacid dehydrogenase kinase transcription induced by the drug FK506in a GCN4-dependent manner    |                                                                                   |
| STF2; G3858; YGR008C ATPase stabilizing factor, binds to F0-ATPase facilitates binding of inhibitor and 9 kDa protein to F1-ATPase                                      |                                                                                   |
| YGR043C; G4301 Protein of unknown function, may be involved in signal transduction has strong similarity to Tal1p                                                       |                                                                                   |
| YGR086C; G4622 Protein of unknown function, expression is induced by high salt and low pH                                                                               |                                                                                   |
| CTT1; G4628; YGR088W Catalase T (cytosolic)                                                                                                                             |                                                                                   |
| YGR130C; G6382 Protein with similarity to Entamoeba histolytica myosin heavy chain PIR:L03534                                                                           |                                                                                   |
| GND2; G9170; YGR256W 6-Phosphogluconate dehydrogenase, decarboxylating, converts 6-phosphogluconate + NADP to ribulose-5-phosphate+ NADPH + CO2                         |                                                                                   |
| YHR087W Protein of unknown function                                                                                                                                     |                                                                                   |
| SPS100; YHR139C Sporulation specific protein involved in spore wall formation, first appears at 12h of sporulation                                                      |                                                                                   |
| NVJ1; VAB36; YHR195W Vac8p-binding protein located at sites of contact between the                                                                                      |                                                                                   |

|                                                                                                                                                        |
|--------------------------------------------------------------------------------------------------------------------------------------------------------|
| nucleus and the vacuole                                                                                                                                |
| XBP1; YIL101C Stress-induced transcriptional repressor                                                                                                 |
| OM45; YIL136W Protein of the outer mitochondrial membrane                                                                                              |
| HYR1; GPX3; YIR037W Glutathione peroxidase involved in oxidative stress response                                                                       |
| GTT1; YIR038C Glutathione transferase                                                                                                                  |
| TOR1; DRR1; J1803; YJR066W Phosphatidylinositol kinase (PI kinase) homolog, involved in cell growth and sensitivity to the immunosuppressant rapamycin |
| YJR096W; J1926 Protein with similarity to aldolase reductase                                                                                           |
| YKL050C; YKL301 Protein of unknown function, has significant similarity to Ymr031p                                                                     |
| YKL098W; YKL448 Protein of unknown function                                                                                                            |
| YKL187C Protein with similarity to 4-mycarosyl isovaleryl-CoA transferase                                                                              |
| YLR164W; L9632.1 Protein with strong similarity to Sdh4p                                                                                               |
| MSC3; L8167.1; YLR219W Protein of unknown function that affects meiotic homologous chromatid recombination                                             |
| FBP1; L8039.18; YLR377C Fructose-1,6-bisphosphatase, gluconeogenic enzyme, activity is inhibited by protein kinase A-mediated phosphorylation          |
| GLO1; YM9571.15; YML004C Glyoxalase I, catalyzes condensation of hemimercaptal adduct of methylglyoxal with glutathione to form S-D-lactoylglutathione |
| MSC1; YM4987.07; YML128C Protein of unknown function that affects meiotic homologous chromatid recombination                                           |
| PLB2; YM8270.08; YMR006C Phospholipase B2 (lysophospholipase), releases fatty acids from lysophospholipids                                             |
| YMR084W; YM9582.09A Protein of unknown function, YMR085W and YMR084W are possible parts of a pseudogene with similarity to Gfa1p                       |
| YMR118C; YM9718.17 Putative succinate dehydrogenase, has similarity to Sdh3p                                                                           |
| SIP18; YM8010.05; YMR175W Protein induced by osmotic stress                                                                                            |
| GAD1; YM9920.04; YMR250W Glutamate decarboxylase                                                                                                       |
| YMR251W; YM9920.05 Putative paralog of Ecm4p                                                                                                           |
| YMR322C; YM9924.14 Protein of unknown function, may be involved in cell stress                                                                         |
| YNL134C; N1214; N1847 Protein with similarity to C. carbonum toxD gene                                                                                 |
| MDG1; N1673; YNR3; YNL173C Protein involved in signal transduction in the mating response                                                              |
| YOR173W; O3625 Protein of unknown function                                                                                                             |
| PUT4; O6345; YOR348C High affinity proline permease, also transports alanine and glycine                                                               |
| YOR391C; O6784 Protein of unknown function                                                                                                             |
| YPL004C; YP8132.09; LPA13 Protein with weak similarity to tropomyosin                                                                                  |
| GRE1; P1715; YPL223C Protein induced by osmotic stress                                                                                                 |
| USV1; P1421; YPL230W Putative finger transcription factor, has a two tandem C2H2-type zinc fingers                                                     |
| YPL280W; P0307 Protein of unknown function                                                                                                             |



Supplementary Table S14: Genes induced in response to YPD in committed cells

The average pattern ( $\log_2$ ratio) is plotted upon transfer to YPD (which was followed for 5, 20 and 40 minutes after the transfer). The genes in the group, along with a one line description, are indicated.

Template genes used to create this group are: SRA1, SWI6, YLR241W, YMR075W, YBR042C, YJL120W, YLR433C and YDR166C

| Average expression                                                                                                                                                                                                                          |  |
|---------------------------------------------------------------------------------------------------------------------------------------------------------------------------------------------------------------------------------------------|-----------------------------------------------------------------------------------|
| EDE1; YBL0520; YBL0501; YBL047C Protein with role in endocytosis, has similarity to cytoskeletal proteins Uso1p and Pan1p and to mousetyrosine kinase substrate eps15                                                                       |                                                                                   |
| YBR042C; CST26; YBR0412 Putative acyltransferase with similarity to Ydr018p                                                                                                                                                                 |                                                                                   |
| MRPL27; YML27; YBR2019; YBR282W Mitochondrial ribosomal protein of the large subunit YDL062W; D2540 Protein of unknown function, questionable ORF                                                                                           |                                                                                   |
| YDL189W; D1260 Protein of unknown function                                                                                                                                                                                                  |                                                                                   |
| YRB1; HTN1; SFO1; (RBP1); CST20; YD8119.08; D2960; YDR002W Protein that stimulates GTPase activity of Gsp1p and Gsp2p in the presence of Rna1p                                                                                              |                                                                                   |
| SEC5; MCD7; YD9489.01; YDR166C Component of exocyst complex, 107 kDa, required for exocytosis                                                                                                                                               |                                                                                   |
| YDR332W; D9798.1 Member of the DEAD-box family of predicted RNA helicases                                                                                                                                                                   |                                                                                   |
| ARO80; D9461.10; YDR421W Positive transcription regulator of ARO9 and ARO10, member of the Zn2Cys6 transcription factor family                                                                                                              |                                                                                   |
| YDR425W; D9461.13 Protein of unknown function                                                                                                                                                                                               |                                                                                   |
| CAJ1; YER048C Homolog of E. coli DnaJ, has a leucine zipper                                                                                                                                                                                 |                                                                                   |
| ADK2; ADK3; AKY3; PAK3; YER170W Adenylate kinase (GTP:AMP phosphotransferase), mitochondrial                                                                                                                                                |                                                                                   |
| MSB2; G4017; YGR014W Protein for which overproduction suppresses bud emergence defect of cdc24 mutant                                                                                                                                       |                                                                                   |
| YGR127W; G6370 Protein with similarity to mouse T10 protein PIR:S37448                                                                                                                                                                      |                                                                                   |
| DIE2; ALG10; ORF525; G8547; YGR227W Glucosyltransferase involved in the terminal glucosylation step of the lipid-linked oligosaccharide                                                                                                     |                                                                                   |
| COQ6; G9165; YGR255C Monoxygenase required for coenzyme Q (ubiquinone) biosynthesis                                                                                                                                                         |                                                                                   |
| SMF2; YHR050W Probable manganese transporter                                                                                                                                                                                                |                                                                                   |
| BCY1; SRA1; (REG1); YIL033C Regulatory subunit of cAMP-dependent protein kinases                                                                                                                                                            |                                                                                   |
| YJL120W; J0734 Protein of unknown function                                                                                                                                                                                                  |                                                                                   |
| YJR084W; J1860 Protein of unknown function                                                                                                                                                                                                  |                                                                                   |
| YKL111C Protein of unknown function questionable ORF                                                                                                                                                                                        |                                                                                   |
| YKL131W Protein of unknown function questionable ORF                                                                                                                                                                                        |                                                                                   |
| SDH1; SDHA HAR2; YKL602; YKL148C Succinate dehydrogenase (ubiquinone) flavoprotein (Fp) subunit, converts succinate plus ubiquinone to fumarate plus ubiquinol in the TCA cycle                                                             |                                                                                   |
| SAC1; RSD1; YKL212W Polyphosphoinositide phosphatase, required for transport of ATP into ER which plays a role in Golgi function and actincytoskeleton organization                                                                         |                                                                                   |
| YKR035C Protein of unknown function                                                                                                                                                                                                         |                                                                                   |
| COX17; L1343; YLL009C Cytoplasmic protein involved in delivery of copper ions to mitochondrial cytochrome oxidase                                                                                                                           |                                                                                   |
| EFR4; L9354.8; L2941; YLR114C Protein with weak similarity in the C-terminus to Drosophila melanogaster bicaudal-D protein                                                                                                                  |                                                                                   |
| CLF1; SYF3; L9233.7; L2952; YLR117C Essential pre-mRNA splicing factor with similarity to Drosophila crooked neck (crn) protein, has tetra-trycotopeptide (TPR) repeats                                                                     |                                                                                   |
| SAM1; ETH10; L9470.9; YLR180W S-adenosylmethionine synthetase 1                                                                                                                                                                             |                                                                                   |
| SWI6; SDS11; PSL8; L9470.8; YLR182W Transcription factor that participates in the SBF complex (Swi4p-Swi6p) for regulation at the cell cycle box (CCB) and in the MBF complex (Mbp1p-Swi6p) for regulation at the Mlu1 cell cycle box (MCB) |                                                                                   |

Supplementary Table S15: Genes repressed in response to YPD in committed cells

The average pattern ( $\log_2$ ratio) is plotted upon transfer to YPD (which was followed for 5, 20 and 40 minutes after the transfer). The genes in the group, along with a one line description, are indicated.

Template genes used to create this group are: KAP104, YBR175W, YMR306CA, YCL066W, YOL032W and YKR010C

| Average expression                                                                                                                                                                                                        | 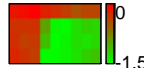 |
|---------------------------------------------------------------------------------------------------------------------------------------------------------------------------------------------------------------------------|-----------------------------------------------------------------------------------|
| LTE1; MSI2; YAL024C GDP/GTP exchange factor                                                                                                                                                                               |                                                                                   |
| KAP104; YBR0224; YBR017C Transportin, beta-karyopherin involved in nuclear transport of mRNA-binding proteins                                                                                                             |                                                                                   |
| YBR051W; YBR0504a Protein of unknown function questionable ORF                                                                                                                                                            |                                                                                   |
| SPT7; GIT2; EFR2; YBR0739; YBR081C Component of the nucleosomal histone acetyltransferase (Spt-Ada-Gcn5-Acetyltransferase or SAGA) complex                                                                                |                                                                                   |
| YBR113W; YBR0908e Protein of unknown function                                                                                                                                                                             |                                                                                   |
| YBR175W; YBR1237 Protein of unknown function, has several WD (WD-40) repeats                                                                                                                                              |                                                                                   |
| PCH2; YBR1308; YBR186W Protein required for cell cycle arrest at the pachytene stage of meiosis in a zip1 mutant, has similarity to Rpt5p and NSF vesicular fusion protein and other members of the AAA family of ATPases |                                                                                   |
| CDC47; MCM7; (MIS1); YBR1441; YBR202W Member of MCM/P1 family of proteins involved in DNA synthesis initiation                                                                                                            |                                                                                   |
| THI2; PHO6; YBR1624; YBR240C Zinc-finger regulatory protein for thiamine pyrophosphokinase (THI80) expression                                                                                                             |                                                                                   |
| YBR300C; YBR2120 Protein of unknown function                                                                                                                                                                              |                                                                                   |
| YCL034W; YCL186; LSB5 Protein with possible role in the regulation of actin cytoskeletal organization                                                                                                                     |                                                                                   |
| YCL063W; YCL062W Protein involved in sensitivity to certain drugs has similarity to plant aminocyclopropane-1-carboxylate synthase                                                                                        |                                                                                   |
| ALPHA1; MATA1; HMLALPHA1; YCR040W; YCL066W Regulatory protein Alpha1p, with Mcm1p, activates alpha-specific genes                                                                                                         |                                                                                   |
| YCR097wa                                                                                                                                                                                                                  |                                                                                   |
| YDL038C; D2726 Protein of unknown function                                                                                                                                                                                |                                                                                   |
| SSB1; YG101; D0819; YDL229W Heat shock protein of HSP70 family, involved with the translational machinery                                                                                                                 |                                                                                   |
| BUD26; YD8419.08; YDR241W Protein of unknown function                                                                                                                                                                     |                                                                                   |
| MPS2; MMC1; G3219; YGL075C Protein of the nuclear envelope/endoplasmic reticulum required for spindle pole body assembly and normal chromosome segregation                                                                |                                                                                   |
| MGA1; G9130; YGR249W Protein with similarity to heat shock transcription factors                                                                                                                                          |                                                                                   |
| MUC1; FLO11; YIR019C Cell surface flocculin, required for invasive and pseudohyphal growth                                                                                                                                |                                                                                   |
| DAL3; YIR032C Ureidoglycolate hydrolase involved in utilization of purines as nitrogen sources by converting (-)-ureidoglycolate + H <sub>2</sub> O to glyoxylate + 2 NH <sub>3</sub> + CO <sub>2</sub>                   |                                                                                   |
| ASF1; J0755; YJL115W Component of replication-coupling chromatin assembly factor (RCAF), target of the Rad53p-dependent DNA damage response                                                                               |                                                                                   |
| YNK1; YNK NDK1; YKL333; YKL067W Nucleoside diphosphate kinase, responsible for synthesis of all nucleoside triphosphates except ATP                                                                                       |                                                                                   |
| TOF2; YK109; YKR010C Protein that interacts with DNA topoisomerase I                                                                                                                                                      |                                                                                   |
| YLL037W; L0910 Protein with weak similarity to human platelet-activating factor receptor                                                                                                                                  |                                                                                   |
| KRE34; L_C144 YLR317W Protein of unknown function questionable ORF                                                                                                                                                        |                                                                                   |
| TOM37; PET3027; MAS37; YM9796.13; YMR060C Component of the mitochondrial outer membrane receptor (TOM) complex, required only at high temperature, contains tetratricopeptide (TPR) repeats                               |                                                                                   |
| SGS1; (TPS1); YM9646.02; YMR190C DNA helicase of DEAD/DEAH family, has similarity to                                                                                                                                      |                                                                                   |

|                                                                                                                                                                                                                     |
|---------------------------------------------------------------------------------------------------------------------------------------------------------------------------------------------------------------------|
| the human Werner's and Bloom's syndromes genes and to E. coli RecQ 3'-5' DNA helicase                                                                                                                               |
| YMR206W; YM8325.07 Protein of unknown function                                                                                                                                                                      |
| YNL089C; N2242 Protein of unknown function, questionable ORF                                                                                                                                                        |
| YNL105W; N2169 Protein of unknown function, questionable ORF                                                                                                                                                        |
| YNL203C; N1358 Protein with weak similarity to Bacillus subtilis CDPdiacylglycerol--serine O-phosphatidyltransferase                                                                                                |
| THI12; N0295; YNL332W Biosynthetic enzyme involved in thiamine utilization pathway, involved in conversion of hydroxymethyl-pyrimidine precursor to thymidine Thi5p, Thi11p, Thi12p and Thi13p are nearly identical |
| YOL032W; O2133 Protein of unknown function                                                                                                                                                                          |
| YOL163W; O0230 Protein with weak similarity to Pseudomonas putida phthalate transporter                                                                                                                             |
| SGT2; UNF346; O2537; YOR007C Protein of unknown function, contains tetratricopeptide (TPR) repeats                                                                                                                  |
| SEN54; LPF3; YPL083C tRNA splicing endonuclease, alpha subunit                                                                                                                                                      |
| YPL099C; LPG9 Protein of unknown function                                                                                                                                                                           |
| RNY1; LPH4; YPL123C Ribonuclease of the ribonuclease T2 family                                                                                                                                                      |
| ATP20; SU_G YP9531.14; YPR020W F1F0-ATP synthase complex F0 membrane domain g subunit                                                                                                                               |
| YPR130C; P9659.10A Protein of unknown function questionable ORF                                                                                                                                                     |
| DPB2; P9705.7; YPR175W DNA polymerase epsilon 80 kDa subunit                                                                                                                                                        |
| YMR306C-A Protein of unknown function                                                                                                                                                                               |

|                                                                                                                                                                               |
|-------------------------------------------------------------------------------------------------------------------------------------------------------------------------------|
| VPS34; VPT29; VPL7; END12; STT8; L9672.10; YLR240W Phosphatidylinositol 3-kinase (PI 3-kinase) required for vacuolar protein sorting, activated by protein kinase Vps15p      |
| YLR241W; L9672.9 Protein of unknown function                                                                                                                                  |
| IMH1; SYS3; L2142.5; YLR309C Probable coiled-coil protein, single copy and multicopy suppressor of ypt6, contains a Golgi-localization (GRIP) domain                          |
| TUS1; SOP10; L9576.5; YLR425W Protein with similarity to Rom1p and Rom2p GDP-GTP exchange factors                                                                             |
| CRN1; L9576.2; YLR429W Coronin, actin-binding protein, contains WD (WD-40) repeats                                                                                            |
| CNA1; CMP1; L9753.6; YLR433C Calcineurin catalytic (A) subunit, protein serine/threonine phosphatase 2B (PP2B), member of the PPP family of protein phosphatases              |
| YML029W Protein of unknown function                                                                                                                                           |
| CMP2; CNA2; (TSM4572); YM9958.05; YML057W Calcineurin catalytic (A) subunit, protein serine/threonine phosphatase 2B (PP2B), member of the PPP family of protein phosphatases |
| ALO1; ALO YML086C D-arabinino-1,4-lactone oxidase (L-galactono-gamma-lactone oxidase)                                                                                         |
| YMR045C                                                                                                                                                                       |
| YMR075W; YM9916.14 Protein of unknown function, contains a PHD domain                                                                                                         |
| YMR140W; SIP5; YM9375.0 Protein interacting with Snf1p and Reg1p                                                                                                              |
| CUE1; YM8156.06; YMR264W Protein that recruits the soluble ubiquitin-conjugating enzyme Ubc7p to the membrane                                                                 |
| YNL134C; N1214; N1847 Protein with similarity to C. carbonum toxD gene                                                                                                        |
| MRPL19; YML19; N1623; YNL185C Mitochondrial ribosomal protein of the large subunit                                                                                            |
| YOR024W; YOL303.9; OR26.14; O2648 Protein of unknown function                                                                                                                 |
| YOR121C; O3272 Protein of unknown function                                                                                                                                    |
| MYO2; CDC66; O6167; YOR326W Myosin heavy chain, class V, involved in polarized growth and secretion                                                                           |
| YPL025C; LPB6 Protein of unknown function                                                                                                                                     |
| SEC16; LPF1; LST10; YPL085W Hydrophilic protein required for vesicle formation in ER to Golgi transport                                                                       |
| CSR2; MRG19; YP9367.10; YPR030W Protein of unknown function                                                                                                                   |
| DIB1; SNU15; (CDH1); P9513.12; YPR082C Component of the U4/U6.U5 snRNP, also required for mitotic spindle formation or function                                               |
| YPR090W; P9513.3 Protein of unknown function                                                                                                                                  |
| PRP4; RNA4; P9705.6; YPR178W U4/U6 snRNA-associated splicing factor, member of WD (WD-40) repeat family                                                                       |
| SMX3; SMF P9705.4; YPR182W Spliceosomal snRNA-associated Sm core protein, also likely associated with telomerase TLC1 RNA                                                     |

Supplementary Table S16

Strain List. Strains used in this study

| Name    | Full Genotype <sup>a</sup>                                                                                                               | Provider                                                  |
|---------|------------------------------------------------------------------------------------------------------------------------------------------|-----------------------------------------------------------|
| NKY1551 | <i>MATa/MATα ho::LYS2/ho::LYS2, ura3/ura3, lys2/lys2, leu2::hisG/leu2::hisG, arg4-Nsp/arg4-Bgl, his4x::LEU2-URA3 /his4B::LEU2</i>        | N. Kleckner                                               |
| JPY214  | <i>MATa/MATα ho::LYS2/ho::LYS2 lys2/lys2 ura3/ura3 leu2/leu2 his4X-ADE2-his4B/his4X-ADE2-his4B ade2/ade2 Δsum1::kanMX6/Δsum1::kanMX6</i> | J. Segall                                                 |
| NKY1712 | <i>MAT a ho::LYS2 leu2, trp1, ura3, lys2, ho::LYS2, arg4,</i>                                                                            | N. Kleckner                                               |
| NE30    | <i>MATα ho::hisG leu2, trp1, ura3, lys2.ade2</i>                                                                                         | G. Simchen                                                |
| GF18    | <i>MATa/MATα pSPS4-3HA-NDT80/NDT80, ho::LYS2/ho::LYS2, lys2/lys2 leu2/leu2, trp1/trp1, ura3/ura3, ARG4/arg4, URA3/ura3, ADE2/ade2</i>    | Constructed in this study                                 |
| NKY1059 | <i>MAT a lys2,ura3,leu2,ade2,his4,ho::hisG</i>                                                                                           | N. Kleckner                                               |
| NKY561  | <i>MATα lys2,ura3(Psl-Smal)::hisG, leu2::hisG, trp1::hisG, ho::hisG</i>                                                                  | N. Kleckner                                               |
| DS1     | <i>MATa/MATα lys2,ura3,leu2,ho::hisG</i>                                                                                                 | Constructed in this study by mating of NKY1059 and NKY561 |

<sup>a</sup> All strains are in the SK1 genetic background

Supplementary Table S17: Media used in the present study

Minimal Supplemented SD plates (for diploid selection)

2% glucose  
0.17% yeast nitrogen base  
0.5% ammonium sulfate  
1.5% agar  
supplemented with Uracil, Leucine and Tryptophan

His- SD plates (for recombination assay)

2% glucose  
0.17% yeast nitrogen base  
0.5% ammonium sulfate  
1.5% agar  
supplemented with all amino acids except His

Sporulation plates

0.25% yeast extract  
1.5% Potassium Acetate  
0.25% Glucose  
1.5% agar  
supplemented with all amino acids

YPD

2% yeast extract  
4% Bactopectone  
4% glucose

YPA

1% yeast extract  
1% potassium acetate  
2% Bactopectone

SPM

0.3%-1% potassium acetate  
0.02% raffinose

Glucose

4% Glucose
